This is the version of the article before peer review or editing, as submitted by an author to Journal of Neural Engineering. IOP Publishing Ltd is not responsible for any errors or omissions in this version of the manuscript or any version derived from it.

## 1           **Photovoltaic stimulation efficiently evokes network-mediated activity of retinal ganglion cells**

2                           Naïg A. L. Chenais<sup>1</sup>, Marta J. I. Airaghi Leccardi<sup>1</sup>, and Diego Ghezzi<sup>1,\*</sup>

3  
4           <sup>1</sup> Medtronic Chair in Neuroengineering, Center for Neuroprosthetics and Institute of Bioengineering, School  
5 of Engineering, École Polytechnique Fédérale de Lausanne, Switzerland

6  
7           \* Corresponding author: [diego.ghezzi@epfl.ch](mailto:diego.ghezzi@epfl.ch).

8  
9           Keywords: Retinal prostheses, POLYRETINA, Photovoltaic stimulation, Capacitive-like stimulation,  
10 Network-mediated activity.

### 11           **Abstract**

12           Objective. Photovoltaic retinal prostheses theoretically offer the possibility of standalone high-resolution  
13 electrical stimulation of the retina. However, in artificial vision, achieving locally selective epiretinal  
14 stimulation is particularly challenging, on the grounds of axonal activation and electrical cell coupling.

15           Approach. Here we show that electrical and photovoltaic stimulation of dystrophic retinal circuits with  
16 capacitive-like pulses leads to a greater efficiency for indirect network-mediated activation of retinal ganglion  
17 cells. In addition, a biophysical model of the inner retina stimulation is proposed to investigate the waveform  
18 and duration commitments in the genesis of indirect activity of retinal ganglion cells.

19           Main results. Both in-vitro and in-silico approaches suggest that the application of long voltage pulses or  
20 gradual voltage changes are more effective to sustainably activate the inner excitatory and inhibitory layers of  
21 the retina, thus leading to a reproducible indirect response. The involvement of the inhibitory feedback from  
22 amacrine cells in the forming of indirect patterns represents a novel biological tool to locally cluster the  
23 response of the retinal ganglion cells.

24           Significance. These results demonstrate that recruiting inner retina cells with epiretinal stimulation enables not  
25 only to bypass axonal stimulation but also to obtain a more focal activation thanks to the natural lateral  
26

This is the version of the article before peer review or editing, as submitted by an author to Journal of Neural Engineering. IOP Publishing Ltd is not responsible for any errors or omissions in this version of the manuscript or any version derived from it.

- 27 inhibition. In this perspective, the use of capacitive-like waveforms generated by photovoltaic prostheses may  
28 allow improving the neural response resolution while standing high-frequency stimulation.

This is the version of the article before peer review or editing, as submitted by an author to Journal of Neural Engineering. IOP Publishing Ltd is not responsible for any errors or omissions in this version of the manuscript or any version derived from it.

## 29 **1. Introduction**

30 Retinal dystrophies, such as age-related macular degeneration and retinitis pigmentosa, are ranked among the  
31 three leading causes of visual impairment worldwide (together with cataract and glaucoma) and are the primary  
32 cause of visual deficit in middle income and industrialized countries, with a prevalence above 15 % [1–3].  
33 Though, inner and ganglion retinal neurons are known to be temporarily spared by the degeneration process  
34 and to be electrically excitable to convey artificial visual inputs to the lateral geniculate nucleus [4–7]. Several  
35 retinal prostheses have been developed in the past decade and demonstrated promising results to restore an  
36 elementary form of vision, including discrimination of high-contrast gratings, reading of large prints, and  
37 spatial orientation [7–13]. Nonetheless, current clinical implants provide limited visual acuity, and the sight  
38 quality is still far away from being adequate in daily life [14]. Spatial resolution keeps being one of the biggest  
39 challenges (together with the wideness of the visual field) to achieve a valuable artificial vision restoration. To  
40 overcome those challenges, we have designed a wireless epiretinal prosthesis (POLYRETINA) able to restore  
41 a theoretical visual acuity of 20/600 and a visual field of 46 degrees, thanks to miniaturized photovoltaic pixels  
42 made of organic semiconductors [15].

43 The stimulation resolution in epiretinal configuration could be improved in various complementary ways:  
44 minimizing the spread of the electric field generated by single electrodes to avoid stimulation crosstalk [15,16],  
45 reducing the electrode to retinal ganglion cell (RGC) layer distance to enhance stimulation specificity [17–19],  
46 increasing the charge injection capacity of microelectrodes [20–22], identifying the stimulation protocol able  
47 to selectively activate RGCs nearest the electrode [23,24], or selecting the electrode array features curtailing  
48 the activation of RGCs distal axon segments [25,26]. Indeed, the poor visual acuity reported in patients is often  
49 associated with the perception of amplitude-dependent elongated phosphenes [27,28], attributed to the local  
50 hyperpolarization of axons of passage located between the epiretinal array and the RGC layer [7,25,26]. This  
51 local depolarization can be antidromically propagated until the ganglion cell soma located further away from  
52 the electrode, leading to diffuse ovoid activation of the retinal map, thus making it difficult for an implanted  
53 patient to perceive complex shapes [29,30]. Though the axon initial segment is the compartment exhibiting the  
54 lowest activation threshold [29], in practice, its activation threshold is barely discriminable from the ones of  
55 more distal axonal segments [26], making spatially selective stimulation of RGCs a challenge.

This is the version of the article before peer review or editing, as submitted by an author to Journal of Neural Engineering. IOP Publishing Ltd is not responsible for any errors or omissions in this version of the manuscript or any version derived from it.

56 To overcome this issue, a large share of effort has been directed towards the understanding of indirect  
57 stimulation of RGCs [31,32], which arises from the activation of presynaptic neurons, such as bipolar cells  
58 (BCs) and/or photoreceptors (PRs), which in turn lead to a secondary network-mediated excitation of RGCs  
59 [31,33–37]. In general, subretinal prostheses are considered to be more efficient in targeting those presynaptic  
60 neurons, due to their location [30,31]. However, the long-term efficacy of subretinal prostheses could be  
61 limited by other aspects, such as a more complex surgical approach, the limited possibility of replacement, or  
62 the presence of a glial seal upon PR degeneration. Nonetheless, although epiretinal arrays deliver stimuli from  
63 the RGC side, they have also shown the ability to elicit indirect stimulation [31,33], which makes the epiretinal  
64 configuration particularly advantageous to bypass the aforementioned problems while providing a network  
65 integrated form of stimulation. Although no clear discrimination can be made between direct and indirect  
66 activation thresholds for epiretinal configuration [15,31], it has been established that pulses of short duration  
67 (shorter than 0.7 ms) preferentially directly activate RGCs (e.g. by activation of their axons), generating a  
68 single action potential with high temporal precision [34,35]. On the contrary, pulses of longer duration also  
69 lead to an additional indirect excitation of RGCs [31,33,35,36,38]. Indirect firing patterns have been reported  
70 to occur within 10 to 70 ms after the stimulus delivery, with a great variation between experimental designs  
71 [31–38]. Despite this apparent lack of temporal precision, it has been demonstrated that electrically induced  
72 indirect responses of RGCs closely matches with the spatiotemporal complex light-evoked responses [39].  
73 Both the Argus<sup>®</sup> II retinal prosthesis and the Alpha-IMS implant, the two systems currently approved by  
74 regulatory bodies, focus on temporal precision and respectively use pulses of 0.45 ms [8] and 1 ms [9].  
75 However, a recent study pointed out the relationship between the inner retina activation elicited by long pulses  
76 and the achieved spatial resolution both in-vitro and in patients implanted with the Argus<sup>®</sup> II device [24]. All  
77 these pieces of evidence suggest a clinical relevance of indirect activity to improve the resolution of retinal  
78 responses upon electrical stimulation. However, little is known about the exact mechanisms behind the  
79 epiretinal indirect activation of RGCs. Converging evidence suggests the activation of the inner retina layer as  
80 the main factor causing the biphasic spiking pattern of RGCs [15,31,36,40,41]. Because of their elongated  
81 shapes, spared PRs are as well susceptible to be activated by extracellular voltage gradients around the  
82 stimulation site. Moreover, taking into consideration the milliseconds latency between direct and indirect

This is the version of the article before peer review or editing, as submitted by an author to Journal of Neural Engineering. IOP Publishing Ltd is not responsible for any errors or omissions in this version of the manuscript or any version derived from it.

83 activities, together with the oscillatory spiking pattern reported notably in brisk-transient RGCs [38], it is likely  
84 that the generation of a network-mediated response involves the coordinate activation of several cell types,  
85 including the retinal inhibitory network.

86 Our previous work with POLYRETINA has shown that light sensitivity could be restored in retinal  
87 degeneration 10 (rd10) mice retinas at advanced stages of degeneration thanks to photovoltaic stimulation [15].  
88 Consistently with other groups' findings, we reported both direct and indirect activation of targeted RGCs,  
89 upon delivery of 10-ms light pulses. Although pulses with a rectangular shape are conventionally used in  
90 retinal prostheses, our photovoltaic interfaces intrinsically generate non-rectangular capacitive-like  
91 photocurrent and photovoltage pulses [15]. Growing insights suggest that non-rectangular pulses can elicit  
92 stronger network-mediated RGC activity than rectangular ones; in fact, stimulus shapes with low charge  
93 increase rates are able to elicit a stronger activation of the presynaptic neurons, leading to increased RGC  
94 indirect firing activity. Conversely, low-pass filtering inner retinal cells are less activated by high-frequency  
95 signals such as rectangular ones, more favourable to the direct depolarization of RGCs [42,43].

96 Given the importance of selective network-mediated stimulation, we explored whether and how our  
97 photovoltaic approach alters the response pattern of RGCs by favourably eliciting network mediated activity  
98 instead of direct RGC depolarization. Our findings commit to being generalised to improve the spatial  
99 selectivity of epiretinal prostheses.

100

## 101 **2. Methods**

### 102 **2.1 Electrophysiology**

103 Experiments were conducted according to the ethical authorization GE3717 approved by the Département de  
104 l'emploi, des affaires sociales et de la santé (DEAS), Direction générale de la santé of the République et Canton  
105 de Genève, Switzerland. RGC activity was recorded from rd10 mice at post-natal days (P)  $144 \pm 18.5$  (mean  
106  $\pm$  s.d). Eyes were enucleated from euthanized mice (sodium pentobarbital,  $150 \text{ mg kg}^{-1}$ ) and dissected in  
107 carboxygenated (95% O<sub>2</sub> and 5% CO<sub>2</sub>) Ames' medium (A1420, Sigma-Aldrich). Retinas were mounted  
108 ganglion cell down and maintained in contact with the substrate using a 1 mm nylon mesh. Retinas were

This is the version of the article before peer review or editing, as submitted by an author to Journal of Neural Engineering. IOP Publishing Ltd is not responsible for any errors or omissions in this version of the manuscript or any version derived from it.

109 continuously superfused with carboxygenated Ames' medium at 32°C and maintained under dim red light  
110 during all the experiments.

111 Photovoltaic stimulation was carried out with the central part of the POLYRETINA photovoltaic array,  
112 consisting of 80- $\mu$ m diameter electrodes distributed with a 150- $\mu$ m pitch [15]. Electrical stimulation was  
113 carried out with a custom-made microelectrode array (MEA), consisting in a grid of 16 x 16 (256) titanium  
114 electrodes (80- $\mu$ m diameter) distributed with a 150- $\mu$ m pitch. Retina explants were illuminated with an  
115 inverted microscope (Ti-E, Nikon Instruments) and a LED illuminator (Spectra X, emission filter 560/32 nm,  
116 Lumencor). The microscope was equipped with a dichroic filter (FF875-Di01-25  $\times$  36, Semrock) and 4x / 10x  
117 / 20x objectives (diameter of the illumination spot 5.5, 2.2, and 1.1 mm respectively; CFI Plan Apochromat  
118 Lambda). The stimulation protocol consisted of a repetition of 10 pulses at 1 Hz for each condition. Irradiance,  
119 stimulus shape, and pulse duration were increased sequentially up to the condition eliciting the highest RGC  
120 activity.

121 In experiments involving photovoltaic and electrical stimulation, the activity of RGCs was recorded  
122 extracellularly with a sharp metal electrode (PTM23BO5KT, World Precision Instruments), amplified (Model  
123 3000, A-M System), filtered (300 - 3000 Hz), and digitalized at 30 kHz (Micro1401-3, CED Ltd.). Spike  
124 detection and sorting were performed by threshold detection using a MATLAB-based algorithm (Wave\_clus47  
125 [44]); results were further processed with MATLAB (Mathworks). An exclusion period of  $\pm$  1 ms around light  
126 onset and offset was applied and spikes detected in the first 10 ms after light onset were manually verified to  
127 ensure a proper artefact rejection. Spikes raster from 10 consecutive sweeps were averaged and discretize to  
128 compute 10-ms bins PSTHs. Spikes were classified into short, medium, and long latency (respectively SL,  
129 ML, and LL) according to their timing after light onset, as in a previously described procedure [15]. The  
130 electrical receptive fields from individual RGCs upon electrical stimulation were centred on the electrode  
131 eliciting the maximal ML activity under 50-ms stimulation and normalized according to the ML firing rate  
132 achieved. The electrical receptive field (eRF) diameters were calculated as the full width at median response  
133 amplitude of experimental firing rates fitted distributions. For the assessment of the natural light responsivity,  
134 retinas from rd10 mice at various ages were mounted on filter paper and placed ganglion cell down on a  
135 transparent MEA with 256 electrodes (256MEA200/30iR-ITO, Multichannel Systems). The voltages of the

This is the version of the article before peer review or editing, as submitted by an author to Journal of Neural Engineering. IOP Publishing Ltd is not responsible for any errors or omissions in this version of the manuscript or any version derived from it.

136 256 recording electrodes were amplified, filtered (300 – 3000 Hz), and digitalized with a 10 kHz sampling  
 137 frequency (USB-MEA256-System, Multichannel Systems). Spike sorting from recordings were performed  
 138 with MC\_rack software (V 4.6.2, Multichannel systems); results were further processed with Neuroexplorer  
 139 (v4, Neuronexus) and MATLAB.

## 140 2.2 Computational model

141 Biophysical retinal layers were modelled using Python-based NEST 2.14.0 Simulator tool [45]. A grid of 10  
 142 x 10 unspecific RGCs was modelled as Hodgkin–Huxley neurons, connected with gap junctions and placed  
 143 10  $\mu\text{m}$  above an 80- $\mu\text{m}$  diameter epiretinal electrode. Inner retinal cells were modelled as non-spiking  
 144 integrating neurons, whose parameters are summarised in Table 1.

145 **Table 1** Retinal layer’s parameters

| Neurons layer         | RGC               | AC                | BC                | HC                |
|-----------------------|-------------------|-------------------|-------------------|-------------------|
| Ratio to RGC          | 1                 | 5                 | 4                 | 1                 |
| Distance to electrode | 10 $\mu\text{m}$  | 30 $\mu\text{m}$  | 49 $\mu\text{m}$  | 64 $\mu\text{m}$  |
| Cell diameter         | 10 $\mu\text{m}$  | 5 $\mu\text{m}$   | 5 $\mu\text{m}$   | 10 $\mu\text{m}$  |
| Threshold potential   | -55 $\mu\text{V}$ | -                 | -                 | -                 |
| Resting potential     | -70 $\mu\text{V}$ | -70 $\mu\text{V}$ | -70 $\mu\text{V}$ | -70 $\mu\text{V}$ |

146

147 The layers filters’ time constants were calculated as in equation (1).

$$148 \quad RC = \left( R_{ex} \cdot d + A \cdot \frac{1}{g_{mb}} \right) \cdot \frac{1}{\frac{1}{C_{ex} \cdot d} + \frac{1}{A \cdot C_{mb}}} \quad (1)$$

149 where  $d$  represents the cell distance to the electrode surface and  $A$  the area of bilayer membrane in the  
 150 ascending column between the targeted cell and the electrode, as in equation (2):

$$151 \quad A = a \cdot \rho \cdot \frac{d}{D} \quad (2)$$

152 in which  $\rho$  represents the horizontal cell density in a theoretical receptive field and  $D$  an average retinal cell  
 153 diameter. Parameters values are provided in table 2.

154 **Table 2** Biophysical parameters of the retinal network

| $R_{ex}$ | $C_{ex}$ | $C_{mb}$ | $g_{mb}$ | $a$ | $\rho$ | $D$ |
|----------|----------|----------|----------|-----|--------|-----|
|----------|----------|----------|----------|-----|--------|-----|

This is the version of the article before peer review or editing, as submitted by an author to Journal of Neural Engineering. IOP Publishing Ltd is not responsible for any errors or omissions in this version of the manuscript or any version derived from it.

| <b>Extracellular resistivity</b> | <b>Extracellular capacitance</b> | <b>Passive membrane capacitance</b> | <b>Bilayer membrane conductance</b> | <b>Single cell surface</b> | <b>Cell density in the receptive field</b> | <b>Average retinal cell diameter</b> |
|----------------------------------|----------------------------------|-------------------------------------|-------------------------------------|----------------------------|--------------------------------------------|--------------------------------------|
| [ $\Omega\text{m}^{-1}$ ]        | [ $\text{Fm}^{-1}$ ]             | [ $\text{Fm}^{-2}$ ]                | [ $\mu\Omega^{-1}\text{m}^{-2}$ ]   | [ $\mu\text{m}^2$ ]        | [-]                                        | [ $\mu\text{m}$ ]                    |
| 10                               | 0.1                              | 0.01                                | 5                                   | 300,000                    | 42.8                                       | 7                                    |

155

156 The voltage density probability around and above the epiretinal electrode was simulated with a finite element  
 157 analysis (FEA) method (COMSOL Multiphysics® v. 5.2.), with a stationary electric current study. The ground  
 158 was situated at the bath top and lateral walls, located respectively 2 mm and 1 mm away from the studied pixel.  
 159 The retinal tissue was placed from 10 to 110  $\mu\text{m}$  above the electrode surface. The distribution of the voltage  
 160 densities in the retina was evaluated every 5  $\mu\text{m}$  from the retinal surface. For each material, the conductivity  
 161 ( $\text{S m}^{-1}$ ) and relative permittivity values were set to: titanium ( $2.6 \times 10^6 / 1$ ), P3HT:PCBM (0.1 / 3.4),  
 162 PEDOT:PSS (30 / 3), Saline (1 / 80), PDMS ( $2 \times 10^{-14} / 2.75$ ), and retinal tissue (0.1 / 0.01). Prosthetic voltage  
 163 density for artificial neurons stimulation was spatially approximated as a Gaussian probability distribution and  
 164 temporally fitted as a first-degree exponential peaking at the FEA output values. The membrane potential of  
 165 the cells located in the centre of the stimulated electrode, the corresponding RGC PSTH, and the two-  
 166 dimensional firing activity was directly assessed using the multimeter tool. The AC activity level was evaluated  
 167 with respect to the minimum AC membrane potential allowing network-mediated activity (-21.53 mV). The  
 168 spatial extent of the RGC activity was calculated as the full width at half maximum of the RGC population  
 169 activity gaussian fit. The spatial extent of the AC activity was assessed as the full width to AC membrane  
 170 potential activation threshold of the AC membrane potential fitted distribution.

171

### 172 3. Results

#### 173 3.1 Photovoltaic stimulation of the inner retinal network



This is the version of the article before peer review or editing, as submitted by an author to Journal of Neural Engineering. IOP Publishing Ltd is not responsible for any errors or omissions in this version of the manuscript or any version derived from it.

174 All the experiments have been performed with explanted retinas from rd10 mice, which is an established model  
175 for retinitis pigmentosa [46–49]. However, in order to formally exclude any intrinsic light responsivity from  
176 possible surviving PRs, we first assessed the time course of the light responsivity decay at the wavelength and  
177 irradiances used for prosthetic stimulation with POLYRETINA, namely full-field light pulses of 10 ms at 560  
178 nm, with irradiances ranging from 0.39 to 27.2 mW mm<sup>-2</sup> (**Fig. 1a**). The relative percental increase or decrease  
179 in firing rate during a 180-ms time window after light onset (with respect to a 100-ms time window before the  
180 light onset) has been measured to determine a light responsivity index accounting for both ON and OFF  
181 transient and sustained responses ( $N = 4$  retinas per timepoint, all RGCs recorded for each retina have been  
182 averaged). Rapidly after the formation of functional PRs at P16, a rapid decay in the light responsivity index  
183 has been observed up to P60, where it reaches its minimum value and remains constant around a baseline value  
184 of 0 regardless of the irradiance used (**Fig. 1b**). The time course of this loss of light sensitivity is in line with  
185 the reported anatomical changes in the outer nuclear layer of rd10 retinas [42,43]. In young retinas (from P16  
186 to P45), mostly transient response patterns could be detected (**Fig. 1a**), with a mean ( $\pm$  s.d.) latency of  $69.8 \pm$   
187 10 ms. In such light-sensitive retinas, green light responsivity increases with stimulus intensity up to 1.3 mW  
188 mm<sup>-2</sup>; after which irradiance increase weakens the average retina's response, most probably because of M-  
189 cones saturation and eventually bleaching for the highest values of intensities tested (higher than 9 mW mm<sup>-2</sup>),  
190 as visible at the P16 time point. In retinas over P60, no significant light responding RGC could be recorded.  
191 Contrarily, the vast majority of RGCs from retinas explanted at those advanced stages of degeneration exhibits  
192 a robust light-independent spontaneous activity pattern with a peak frequency of about 10 Hz, in line with  
193 previous reports [48–50]. The more advanced the degeneration process of the recorded retinas, the higher the  
194 number of cells presenting strong spontaneous activity could be observed, with a peak around P100. To ensure  
195 a proper exclusion of intrinsic light-responses together with a proper detection of functional RGCs, further  
196 experiments have been performed on rd10 retinas at late stages of degeneration (i.e. after P120).  
197 Then, we investigated whether with the photovoltaic approach the duration of the light pulse alters the response  
198 pattern of RGCs, similar to what has been reported for electrical stimuli [31,32]. Retinas have been explanted  
199 over the POLYRETINA prosthesis with 80- $\mu$ m photovoltaic pixels in epiretinal configuration and the activity  
200 of RGCs ( $n = 16$  from  $N = 9$  retinas) has been recorded upon light pulses of 10, 20, 50, and 100 ms, with

This is the version of the article before peer review or editing, as submitted by an author to Journal of Neural Engineering. IOP Publishing Ltd is not responsible for any errors or omissions in this version of the manuscript or any version derived from it.

201 irradiances ranging from 1.09 to 91.59 mW mm<sup>-2</sup>. Consistently to other reports [8,9,14,15], extracellular  
202 recordings under photovoltaic stimulation reveal a spiking pattern of RGCs made of two to three waves of  
203 activation, referred as SL, ML, and LL activities. Direct activity (SL) is theoretically elicited within a time  
204 window of few milliseconds from the pulse onset. As we have previously documented with POLYRETINA,  
205 such direct activation can be evoked from a low irradiance threshold (47.35 μW mm<sup>-2</sup>) [15]. Within the tested  
206 irradiance range (from 1.09 to 91.59 mW mm<sup>-2</sup>) and pulse durations (from 10 to 100 ms), SL spikes are elicited  
207 at an average (± s.e.m.) stable frequency of 36.9 ± 8.25 Hz (**Fig. 2d**, top). Instead, indirect (ML and LL)  
208 activity, originating from the activation of the upstream retinal network, strongly depends on the light  
209 exposure, both on irradiance and on pulse duration (**Fig. 2b-d**). As previously reported [15,31], irradiance  
210 thresholds for direct and indirect activities are barely discriminable, and ML activity could be recorded from  
211 the lowest irradiance tested (1.09 mW mm<sup>-2</sup>). LL activity requires higher exposure to appear; it has been  
212 detected from an irradiance of 11.68 mW mm<sup>-2</sup>, for the longest pulses only (**Fig. 2b**, red arrow), or higher for  
213 shorter pulse duration. The independent increase of either irradiance or pulse duration allows the strengthening  
214 of the indirect responses (ML and LL). Over-threshold indirect activity (ML) rose up to 68 ± 8.3 % (mean ±  
215 s.e.m) of its initial values with an exposure increase from 1.09 to 91.59 mW mm<sup>-2</sup> (average of all pulse  
216 durations tested). Besides, over-threshold indirect activity rose by 44 ± 7.4 % (mean ± s.e.m) when lengthening  
217 the stimulation time from 10 to 100 ms (average of all irradiances tested). The highest indirect (ML) activity  
218 is recorded at maximal irradiance and pulse duration conditions (100 ms, 91.59 mW mm<sup>-2</sup>) and could go up  
219 until 135.83 ± 8.25 Hz (mean ± s.e.m.). Noteworthy, not all the recorded RGCs showed a third wave of activity  
220 (LL), independently of the animal age and retina quadrant recorded. It is also worth to mention that RGC  
221 stimulation, if it does not completely abolish cells' spontaneous activity, disrupts the excitatory oscillation  
222 during the evoked spiking pattern (**Fig. 2a**).

### 223 **3.2 Photovoltaic versus rectangular stimulation of the inner retinal network**

224 Second, we investigated whether the specific pulse shape of the photovoltage delivered by POLYRETINA had  
225 an impact on its ability to activate the inner retinal network. Retinas have been explanted in epiretinal  
226 configuration over a custom-made MEA with 256 titanium electrodes of 80-μm in diameter and electrically  
227 stimulated with voltage-controlled pulses; the evoked spiking activity of RGCs has been recorded as before

This is the version of the article before peer review or editing, as submitted by an author to Journal of Neural Engineering. IOP Publishing Ltd is not responsible for any errors or omissions in this version of the manuscript or any version derived from it.

228 **(Fig. 3a)**. The mean photovoltage profile (red curve in **Fig. 3b**, data profile obtained from [15]) generated by  
229 the photovoltaic pixels (light pulses of 10 ms and  $0.94 \text{ mW mm}^{-2}$ , leading to a peak voltage of 179 mV) has  
230 been scaled to generate capacitive-like voltage pulses of various peak amplitudes. In a first subset of retinas,  
231 both 10-ms anodic and cathodic capacitive-like profiles of increasing peak voltages (8.95, 17.9, 35.8, 179, 368,  
232 and 895 mV) were randomly injected through the MEA electrode closest to the monitored RGC ( $n = 10$  cells  
233 from  $N = 4$  retinas). In agreement with the hypothesis that network-mediated activity is elicited by the direct  
234 transmembrane depolarization of the inner retinal cells, the threshold for network-mediated activity is lower  
235 in case of the cathodic profile injection with respect to the anodic one (-8.95 mV vs. +17.9 mV, respectively)  
236 for ML activity (**Fig. 3c**, top). The LL activation thresholds did not show any clear trend due to LL high  
237 intrinsic cell-to-cell variability (**Fig. 3c**, bottom). In a second subset of retinas ( $n = 13$  cells from  $N = 11$  retinas),  
238 a wider range of cathodic capacitive-like pulses has been successively injected (from -8.95 to -1790 mV). No  
239 statistical difference has been found between RGC activity elicited by photovoltaic stimulation ( $1.09 \text{ mW}$   
240  $\text{mm}^{-2}$ ) and the corresponding capacitive-like voltage profile (**Fig. 3d**; SL:  $p = 0.17$ ; ML:  $p = 0.16$ ; LL:  $p =$   
241  $0.98$ ; t-test).

242 Next, we compared the spiking activity of RGCs ( $n = 13$  cells from  $N = 11$  retinas) evoked by rectangular  
243 voltage pulses to the one evoked by capacitive-like pulses. Each RGC has been successively stimulated with  
244 rectangular pulses and capacitive-like pulses of identical peak values and of three different durations: 10, 50,  
245 and 100 ms. As before, to obtain capacitive-like pulses of 50 and 100 ms duration, the mean photovoltage  
246 profile generated by the photovoltaic pixels with pulses of 50 and 100 ms ( $0.94 \text{ mW mm}^{-2}$ , data profiles from  
247 [15]) have been scaled to generate capacitive-like voltage pulses of various peak amplitudes. Altogether, in  
248 agreement with the previous set of experiments, direct activity (SL) could be elicited from an average ( $\pm$  s.e.m.)  
249 voltage of  $151 \pm 12.9$  mV and saturated for stimulation amplitudes higher than 358 mV (**Fig.4**). Direct  
250 activation threshold was not significantly different between capacitive-like and rectangular pulses ( $p = 0.37$ , t-  
251 test). On the contrary, indirect activity (ML and LL) is voltage and duration dependent. For identical pulse  
252 durations, the mean ( $\pm$  s.e.m) voltage thresholds obtained with capacitive-like pulses ( $132 \pm 49.5$  mV for 10-  
253 ms pulses;  $149 \pm 35.5$  mV for 50-ms pulses;  $170 \pm 46.1$  mV for 100-ms pulses) were significantly lower ( $p <$   
254  $0.01$  for all pulse durations, t-test) than the thresholds obtained with rectangular pulses ( $695 \pm 124$  mV for 10-

This is the version of the article before peer review or editing, as submitted by an author to Journal of Neural Engineering. IOP Publishing Ltd is not responsible for any errors or omissions in this version of the manuscript or any version derived from it.

255 ms pulses;  $559 \pm 128$  mV for 50-ms pulses;  $577 \pm 128$  mV for 100-ms pulses). Capacitive-like pulses elicited  
256 a mean ( $\pm$  s.e.m) direct activity of  $47.5 \pm 2.72$  Hz, and rectangular pulses elicited a mean ( $\pm$  s.e.m) direct  
257 activity of  $29.3 \pm 1.40$ . The mean ( $\pm$  s.e.m) ML and LL spiking activities elicited with capacitive-like profile  
258 rose respectively to  $41.9 \pm 2.94$  Hz and  $28.5 \pm 3.44$  Hz, and to  $31.4 \pm 2.78$  Hz and  $26.3 \pm 2.29$  Hz with  
259 rectangular ones (**Fig.4c**). The mean ( $\pm$  s.e.m) cells' indirect activity was inflated up to  $16 \pm 3.9$  % of its initial  
260 values by increasing the applied peak voltage from the minimal condition eliciting indirect spikes to the  
261 maximal tested condition (from 358 mV to 1790 mV, average of all pulse durations tested). Likewise, the  
262 mean ( $\pm$  s.e.m) indirect activity rose by  $25 \pm 4.0$  % when lengthening the stimulation time from 10 to 100 ms  
263 (average of all irradiances tested).

### 264 **3.3 Computational model**

265 To provide a valid interpretation of the biophysical origin of the network-mediated spikes and its intricacy  
266 with the stimulus features, we simulated the response of stratified retinal tissue under voltage driven epiretinal  
267 stimulation. Four retinal cells layers have been modelled as a three-dimensional network (**Fig. 5a**): RGCs,  
268 amacrine cells (ACs), BCs, and horizontal cells (HCs). The capacitive-like voltage pulse has been modelled  
269 with a finite element analysis simulation as a local gaussian-shaped voltage increase, whose amplitude  
270 decreases with the depth within the retina (**Fig. 5d**). Given the high electrical resistivity of the neural retina,  
271 less than 5 % of the electric field reaches the PR layer when stimulating in epiretinal configuration, while only  
272 31 % reaches the BC layer. Considering both the resistivity and the high capacitive properties of the neural  
273 retina, each layer has been modelled as a low-pass filter whose impulse response varies according to its  
274 distance from the stimulating electrode (**Fig. 5b**). The in-silico stimulation of the retina leads to a typical  
275 spiking pattern including SL and ML activities. Due to both the layered organization of the retinal cell types  
276 and the different low-pass filter they apply to the stimulus input, each layer reaches an activation peak in an  
277 asynchronous manner, as it can be seen from the simulated membrane potential of an HC, BC, AC, and RGC  
278 located above the centre of the stimulating electrode during a 20-ms rectangular stimulation (**Fig. 5c**). Direct  
279 voltage injection to the RGC layer leads to an action potential initiation within a few milliseconds after the  
280 stimulus onset (SL). However, since the stimulation does not have single cell resolution, the same stimulus  
281 propagates to the neighbouring retinal columns, including the close inhibitory surround. As a result, the

This is the version of the article before peer review or editing, as submitted by an author to Journal of Neural Engineering. IOP Publishing Ltd is not responsible for any errors or omissions in this version of the manuscript or any version derived from it.

282 excitability of the directly stimulated RGCs is decreased by their surrounding ACs. Meanwhile, granted that  
283 the input voltage is sufficient, upstream BCs are also depolarized and synaptically activating downstream  
284 RGCs. Voltage loss and filtering together engender a slow trade-off phase between excitatory and inhibitory  
285 backward inputs. The secondary activity latency is reproducible over stimulation conditions, as it depends on  
286 the connection balance between excitation and inhibition, that is to say, on the network itself, and not on the  
287 stimulation parameters. The burst of RGC secondary activity (ML) is voltage- and amplitude-dependent: it  
288 appears above a flux threshold of  $2.0 \mu\text{V s}$  (**Fig. 5e**). Both BCs and ACs are necessary to produce a secondary  
289 activity pattern with a latency in the order of hundredths of a second (**Fig. 6**).

290 We then stimulated the biophysical network with either rectangular or capacitive-like voltage pulses. The  
291 increasing and decreasing phases of capacitive-like voltage pulse have been here fitted as one-term  
292 exponentials. Membrane potentials' rise in ACs, BCs, and to a lower extent in HCs is observed to be slower  
293 but of higher magnitude when the stimulus is capacitive-like shaped with respect to the rectangularly shaped  
294 one (**Fig. 7a**). Rapid voltage transitions also generate fast interneurons membrane potential rise, but without  
295 any sustained potential. As a consequence, capacitive-like pulses generate in RGCs an average ( $\pm$  s.e.m)  
296 indirect firing activity of  $52.6 \pm 20.0$  Hz, while rectangular pulses generate an average ( $\pm$  s.e.m) indirect firing  
297 activity of  $37.1 \pm 12.3$  Hz (**Fig. 7b**). For identical over-threshold conditions eliciting non-zero indirect activity  
298 with both pulses' shapes, capacitive-like pulses generate an average ( $\pm$  s.e.m) indirect activity  $66.6 \pm 11.7$  %  
299 higher than the one obtained with rectangular pulses. Direct activation of RGCs in-silico is not affected by the  
300 stimulus shape.

301 Recent evidence pointed out the challenge of stimulating from the epiretinal side the deep ganglion cell layer  
302 without promoting local hyperpolarization of axons of passage [25,26]. Epiretinal indirect stimulation of RGCs  
303 is, therefore, a promising strategy to overcome the problem of axonal depolarization and the resulting loss of  
304 resolution. In this perspective, the use of non-rectangular pulses can successfully shift the RGC activation  
305 pattern from direct to indirect activation. **Fig. 7c** shows a linear assumption of the indirect-to-direct firing rates  
306 ratio for various pulse voltages and durations, either rectangularly or capacitive-like shaped. While rectangular  
307 stimuli require high voltages (higher than 1 V) or alternatively very long durations (longer than 60 ms) to  
308 maximize the indirect activity with respect to the direct one, similar activity ratios can be obtained with

This is the version of the article before peer review or editing, as submitted by an author to Journal of Neural Engineering. IOP Publishing Ltd is not responsible for any errors or omissions in this version of the manuscript or any version derived from it.

309 capacitive-like pulses at voltages one order of magnitude lower. Symmetrically, capacitive-like pulses allow  
310 maximising the indirect-to-direct activity ratios with shorter pulses compared to those necessary with  
311 rectangular pulses, which would be hardly compatible with high-frequency stimulation. Optimal parameters  
312 for rectangular and capacitive-like pulses are highlighted respectively in black and red (**Fig. 7c**).

313 In addition, since capacitive-like pulses depolarize qualitatively longer the inner retinal cells and especially  
314 BCs, it facilitates the temporal summation of repetitive stimuli (**Fig. 8**). The conventional stimulation  
315 frequencies used in retinal prostheses range from 5 to 20 Hz [8,9,24,27,28], and recent evidence appoint 10  
316 Hz as an optimal stimulation frequency for epiretinal prostheses within this range [43]. The trade-off between  
317 stimulation frequency and stimulus duration becomes especially important when dealing with photovoltaic  
318 electrodes. A compromise has to be found between maintaining a pulse short enough to avoid photothermal  
319 damage to the retina and still enabling indirect activity and eventually temporal summation. Mastering the  
320 decay speed of the voltage stimulus can be one approach to do so. Tuning the discharge capacitive properties  
321 of the electrode/electrolyte interface can modulate the ML activity elicited by a pulse of identical duration and  
322 voltage (**Fig. 9**). For similar over-threshold single 10-ms pulses, doubling the decay phase time constant  
323 increases the mean ( $\pm$  s.e.m.) ML activity of  $39 \pm 12$  % (**Fig. 9b,c**). No comparable modulation could be found  
324 when varying the rising phase time constant. Last, shuffling the stimulating electrode from epiretinal to  
325 subretinal side allowed to shorten the onset to indirect activity burst delay (**Fig. 10**), as previously reported in-  
326 vitro [31].

327

### 328 **3.4 Spatial selectivity of rectangular and capacitive-like voltage pulses**

329 Ultimately, we addressed the spatial selectivity of capacitive-like voltage pulses using a  
330 computational/experimental hybrid approach. From two-dimensional activation plots of simulated RGC, AC,  
331 BC and HC populations, we estimated the spatial extent of the layers' response to electrical stimulation for  
332 rectangular and capacitive-like, short and long pulses, below or above the indirect activation threshold. **Fig.**  
333 **11** shows the inverse relationship between the spatial extent of the AC layer activation and the spatial extent  
334 of the RGC spiking response to the stimulation. For similar voltage peaks and pulse durations, capacitive-like  
335 pulses can elicit not only higher membrane potential changes in the inhibitory interneurons than rectangular

This is the version of the article before peer review or editing, as submitted by an author to Journal of Neural Engineering. IOP Publishing Ltd is not responsible for any errors or omissions in this version of the manuscript or any version derived from it.

336 pulses, but also affect a wider pool of them, as a result of the gaussian-shaped voltage probability distribution.  
337 This strengthening and widening of the AC response are again observed to be voltage, duration and shape-  
338 dependent (**Fig. 11a,b**). The wider activation of the recorded AC pool is observed under capacitive-like 50-ms  
339 over-threshold stimulation, in which a 7.5 cells-diameter area is activated around the electrode. Though, while  
340 lengthening the stimulation pulse, the gap between AC activation profiles triggered by one or the other pulse  
341 shapes reduces, presumably due to the saturation of network response kinetics. Parallely, the spatial extent of  
342 RGC indirect activity is also observed to be voltage, duration and shape-dependent. Above the indirect  
343 activation threshold, the AC activation spread and the RGC indirect response spread (estimated from a  
344 Gaussian fit of the membrane potentials of the 10 x 10 cell population) can be linearly anticorrelated (**Fig.**  
345 **11c**).

346 We then estimated the eRF of stimulated RGCs in-vitro. Rd10 retinas have been explanted on the custom 80-  
347  $\mu\text{m}$  titanium MEAs and RGCs have been located by recording extracellularly their spontaneous activity. Each  
348 RGC has been successively stimulated from the 20 nearest electrodes with rectangular and capacitive-like short  
349 and long pulses. The portion of the MEA activating either directly or indirectly the recorded cell is labelled as  
350 SL-eRF, ML-eRF, or LL-eRF. eRFs for long, short, capacitive-like, and rectangular pulses are shown in **Fig.**  
351 **12**. Similar to previous experiments, capacitive-like stimuli delivered through the closest (central) electrode  
352 could elicit stronger activity than rectangular stimuli. However, not only the closest electrode has been able to  
353 activate the targeted RGCs. SL-eRFs notably present elongated shapes (**Fig. 12c**), presumably due to axonal  
354 stimulation. An action potential generated in a distal axonal segment and antidromically propagated in less  
355 than 10 ms, would indeed be classified as direct RGC activation (see Methods).

356 Regarding indirect eRFs, the stimulation conditions providing the most focused response are the ones  
357 previously associated with a high indirect activity, namely short and long capacitive-like voltage pulses.

358 Besides the weak values of mean network-mediated activity (due to idiosyncratic preferred stimulation axis),  
359 rectangular pulses exhibit broad indirect eRFs (**Fig. 12b,c**). Rectangular ML-eRFs and LL-eRFs had respective  
360 diameters of 147 and 218  $\mu\text{m}$  (fit of  $n = 8$  cells from  $N = 8$  retinas, pulse duration 10 ms and amplitude 179  
361 mV). On the contrary, capacitive-like pulses exhibit ML-eRFs and LL-eRFs clustered around the central  
362 electrode, with respective diameters of 93 and 110  $\mu\text{m}$  (fit of  $n = 8$  cells from  $N = 8$  retinas, pulse duration 10

This is the version of the article before peer review or editing, as submitted by an author to Journal of Neural Engineering. IOP Publishing Ltd is not responsible for any errors or omissions in this version of the manuscript or any version derived from it.

363 ms and amplitude 179 mV). Furthermore, the longer the pulse duration, the more clustered indirect eRFs is  
364 observed. The narrower eRFs (ML-eRF diameter = 76  $\mu\text{m}$ , LL-eRF diameter = 86  $\mu\text{m}$ ) has been observed for  
365 capacitive-like stimulation of 50 ms.

366

#### 367 **4. Discussion**

368 In this work, we used the POLYRETINA photovoltaic prosthesis [15], whose 80- $\mu\text{m}$  pixels generate cathodic  
369 capacitive-like voltage pulses under green light stimulation, to generate network-mediated activation of RGCs  
370 from dystrophic light-insensitive retinas. In our experiments we have observed that the epiretinal photovoltaic  
371 stimulation of RGCs generates indirect responses 30 % (ML) and 8 % (LL) higher than indirect responses  
372 elicited by electrical stimulation with rectangular pulses under similar conditions (pulse duration and peak  
373 amplitude).

374 Overall, indirect network-mediated activity (ML and LL) could be enhanced by irradiance or voltage increase,  
375 pulse lengthening, and substitution of rectangular pulses into non-rectangular capacitive-like pulses, all  
376 resulting in larger activation of inner retinal interneurons. Both gradual voltage decrease and sustained voltage  
377 delivery showed the ability to maintain non-spiking BCs and ACs active for tenths of seconds after the stimulus  
378 onset, leading to the characteristic RGC activation pattern consisting in a direct single spike from local  
379 membrane depolarization, an inhibition period, and a secondary wave of activation. The contribution of the  
380 inhibitory network to this pattern allows a clustered RGC indirect activation, compared to the spatial extent of  
381 the direct response.

382 We have demonstrated that our photovoltaic approach, despite the apparent loss of temporal precision due to  
383 the capacitive-like voltage transients, is efficient to trigger realistic network-mediated activity in blind retinas  
384 upon epiretinal stimulation. The relevance of the voltage pulse shape and the charge delivery rate is in line  
385 with recent reports about the efficiency of non-rectangular pulses to trigger network-mediated activity [42] and  
386 the sensitivity to low-frequency domains of inner retinal cells [43]. Fast responding spike-encoding RGCs  
387 show preferential sensitivity to rectangular stimuli, while the activation of voltage-encoding interneurons can  
388 be modulated by slower voltage changes such as capacitive-like photovoltaic pulses. However, the biophysical  
389 explanation for this frequency shift remains to be investigated. The indirect activity delay shrinkage that we



This is the version of the article before peer review or editing, as submitted by an author to Journal of Neural Engineering. IOP Publishing Ltd is not responsible for any errors or omissions in this version of the manuscript or any version derived from it.

390 observe when displacing the electrode towards the subretinal space (**Fig. 10**), as it was previously observed in-  
391 vitro [31], suggests that the input filters are not electrophysiological intrinsic properties of the cell types *per*  
392 *se*, but rather consequences of the layered structure of the retina and its electrical resistivity. Reports of direct  
393 response within a timescale of several milliseconds in subretinal configuration, namely twice as long as delays  
394 reported in epiretinal configuration direct stimulation, also supports this hypothesis [31,51].

395 The activation of axon bundles keeps being one of the most challenging aspects of epiretinal stimulation. Our  
396 previous work with POLYRETINA revealed a direct firing probability of about 34 %, and we reported in the  
397 present study a mean ( $\pm$  s.e.m) direct firing activity of  $38.9 \pm 1.2$  Hz. However, in the perspective of axons  
398 stimulation avoidance, and given the ability of the photovoltaic approach to efficiently trigger indirect  
399 activation, it seems more and more realistic to design a stimulation protocol for epiretinal indirect stimulation  
400 thanks to capacitive-like waveforms and long pulse durations (longer than 20 ms).

401 In addition to medium latency spikes, a third indirect and further delayed RGC burst of activity (LL) was  
402 reported in this work and others [31,38] at high stimulation voltages. The identification of sustained RGCs as  
403 generators of successive oscillatory bursts under electrical stimulation, together with the absence of LL activity  
404 in-silico suggests that they might have a functional type related origin. It remains still unclear how the  
405 successive waves of activation would be further processed and interpreted by the visual cortices. The  
406 perception of elongated ovoid phosphenes is imputed to the bidirectional depolarization of axonal fibres  
407 [25,26], that is to say, the temporal precision separating orthodromic and antidromic followed by orthodromic  
408 signals vanished with upstream signal integration. However, indirect waves with a delay in the range of tenths  
409 of seconds may be more prone to reproduce the natural temporal structure of visual responses. Indeed, though  
410 many individual spikes can be timed with millisecond precisions to the visual stimulus they encode, the relative  
411 precision among the activated RGC population is a higher critique feature for information integration in the  
412 thalamus [52]. Approaching the relative temporal structure of natural vision could provide an equally accurate  
413 representation of the slowly changing visual word. The ability of non-rectangular pulses to generate a sustained  
414 membrane potential rise in retinal interneurons also facilitate the temporal summation of under-threshold  
415 stimuli (**Fig. 8**), making it conceptually feasible to abolish any direct depolarization of nearby RGC axon initial  
416 or distal segment, while promoting indirect summed activity.

This is the version of the article before peer review or editing, as submitted by an author to Journal of Neural Engineering. IOP Publishing Ltd is not responsible for any errors or omissions in this version of the manuscript or any version derived from it.

417 Turning epiretinal stimulation into an explicitly indirect strategy is also promising for prosthetic response  
418 resolution. Our results suggest a key role of ACs in the generation of a network-mediated temporal pattern of  
419 activity. In addition, recruiting the natural lateral inhibition circuit allows to spatially cluster the eRFs of  
420 targeted RGCs. Indeed, the assessment of RGCs' eRFs reveals disparities between the spatial distribution of  
421 direct and indirect excitabilities. The clustering of the RGC eRF can notably be impaired by several factors;  
422 the first of them being the local depolarization of the RGC axon by a peripheral electrode, as observed in the  
423 direct individual eRFs and further cancelled out at the population level. The spatial resolution of the stimulation  
424 itself is another spreading factor, considering that a single 80- $\mu$ m diameter electrode can be estimated to cover  
425 the natural RF of 15 to 20 RGCs in an intact mouse retina, but up to 160 RFs in the human fovea [53,54]; and  
426 that the extra potential generated around the electrode can be estimated to cover 10 additional RFs.  
427 Furthermore, gap junctions between RGCs and eventually aberrant connection with peers or other miswired  
428 partners could alter the spatial clustering of the individual RGCs responses. Those three latest points can be  
429 attenuated by decoupling the RGC eRFs ones from the others thanks to their respective inhibitory surrounds.  
430 The sustained stimulation of the inner retina and the lateral inhibitory network, via long pulses or non-  
431 rectangular waveforms, contribute to the clustering of the indirect eRF.  
432 The improvement of the response resolution can be achieved with non-rectangular pulses, but also with long  
433 pulses (longer than 20 ms). Indeed, both strategies exploit the same interneuron's continuous electrical  
434 properties. Various evidence, including ours, demonstrates that long pulses elicit strong network-mediated  
435 activity in RGCs. Our computational-experimental approach suggests that the RGC network-mediated activity  
436 is necessarily associated with a partial activation of the AC layer and backwards inhibition of the eRF surround.  
437 This clarifies the response resolution refinement obtained in-vitro and in-vivo with pulses exceeding 25 ms  
438 [24]. In the above-mentioned study, the calcium imaging readout of spatial RGC activation in-vitro could be  
439 clearly narrowed by the lengthening of electrical stimulation, as complementary do the indirect eRFs.  
440 Similarly, the indirect eRFs clustering that we observed with capacitive-like pulses, that exploits the same  
441 mechanisms, is expected to narrow the spatial extent of RGC layer activation, as computationally simulated.  
442 However, pulses duration dramatically limits the affordable stimulation frequency: an optimal duration pulse  
443 of 25 ms would theoretically limit the prosthesis operating range to 20 Hz (or less if we consider a safe interval

This is the version of the article before peer review or editing, as submitted by an author to Journal of Neural Engineering. IOP Publishing Ltd is not responsible for any errors or omissions in this version of the manuscript or any version derived from it.

444 between consecutive pulses), far below flicker fusion threshold. Non-rectangular waveforms such as our  
445 capacitive-like stimuli allow reaching indirect firing rates comparable to those obtained with 20-ms rectangular  
446 pulses with pulses two times shorter, thus increasing the theoretical stimulation rate limit. Along with this, for  
447 identical pulses duration, the use of non-rectangular pulses enables to lower the voltage threshold necessary to  
448 mobilize both excitatory and inhibitory inner retinal cells.

449 Hereabout, the direct as the indirect activation of rd10 RGCs is significantly higher when the explants have  
450 been stimulated with capacitive-like pulses compared to rectangular stimuli. We classified spikes as direct  
451 (SL) when they happen to occur within the first 10 ms; nevertheless, due to the stimulation artefacts, spikes  
452 occurring within 1.5 ms after the stimulus onset could not be detected. Because slower charge increase delays  
453 the direct spikes timing by up to 2 ms [42], the amount of undetected direct spikes minors with a capacitive-  
454 like stimulus.

455

## 456 **5. Conclusion**

457 Sustained activity of inner retinal neurons can be achieved by delivering non-rectangular voltage pulses and/or  
458 by lengthening the pulses' duration. Such stimulation paradigm allows to indirectly target RGC in a realistic  
459 and focused approach, while benefiting from the implantation convenience of epiretinal devices.

460 Optimal pulse shape engineering is a complementary strategy to further promote network-mediated response  
461 without lengthening the stimulation pulses. A slower discharge rate of the electrode can notably sustain  
462 network excitation and increase resulting RGCs firing rate up to three times the rate recorded with comparable  
463 rectangular pulses. Moreover, our results demonstrate that recruiting inner retina cells with epiretinal  
464 stimulation enables not only to bypass axonal stimulation but also to obtain a more focal activation thanks to  
465 the natural lateral inhibition. Additional in-vitro evidence suggests a conjoint role of the ascending stimulus  
466 ramp on the ability to generate indirect activity [42].

467 In this perspective, the use of capacitive-like waveforms generated by photovoltaic prostheses (e.g.  
468 POLYRETINA) may allow improving the neural response resolution while standing high-frequency  
469 stimulation. At last, the relevance of the strategies for network-mediated activity enhancing to improve

This is the version of the article before peer review or editing, as submitted by an author to Journal of Neural Engineering. IOP Publishing Ltd is not responsible for any errors or omissions in this version of the manuscript or any version derived from it.

470 artificial vision resolution will require to be established by evaluating the restored visual acuity both in in-vitro  
471 and in-vivo.

#### 472 **Acknowledgements**

473 This work has been supported by École Polytechnique Fédérale de Lausanne, Medtronic, and Fondation Pierre  
474 Mercier pour la science. We would like to thank Alban Bornet and Anton Voronov for their help in Python.

475

#### 476 **Author contributions**

477 N.A.L.C. designed the study, performed all the experiments and simulations, and wrote the manuscript.  
478 M.J.I.A.L. fabricated the photovoltaic array and the custom MEA for electrical retinal stimulation and designed  
479 FEA simulations. D.G. designed and led the entire study. All the authors read, edited and accepted the  
480 manuscript.

481

#### 482 **Competing Financial Interests statement**

483 The authors declare no competing financial interests. Correspondence and requests for materials should be  
484 addressed to D.G. ([diego.gheszi@epfl.ch](mailto:diego.gheszi@epfl.ch)).

This is the version of the article before peer review or editing, as submitted by an author to Journal of Neural Engineering. IOP Publishing Ltd is not responsible for any errors or omissions in this version of the manuscript or any version derived from it.

485

**Figure 1**

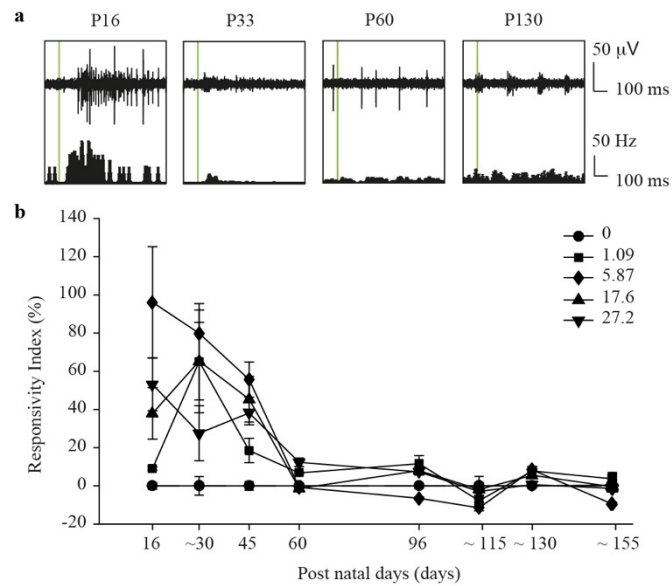

486

487 **Figure 1** Light responsivity decay in rd10 retinas over the degeneration process. **a** Representative spiking  
488 activity from rd10 RGCs explanted at P16, P33, P60, and P130 in response to a light pulse (10 ms, 560 nm,  
489 1.09 mW mm<sup>-2</sup>). **b** Mean ( $\pm$  s.e.m,  $N = 4$  retinas) light responsivity index upon illumination (10 ms, 560 nm)  
490 of rd10 retinas recorded at P16, [P28-P38], P45, P60, P96, [P109-P116], [P128-P133], and [P153- P156]. For  
491 each RGC 10 sweeps have been averaged. Data have been shown only for five irradiances: 0, 1.09, 5.86, 17.6,  
492 and 27.2 mW mm<sup>2</sup>.

This is the version of the article before peer review or editing, as submitted by an author to Journal of Neural Engineering. IOP Publishing Ltd is not responsible for any errors or omissions in this version of the manuscript or any version derived from it.

493

Figure 2

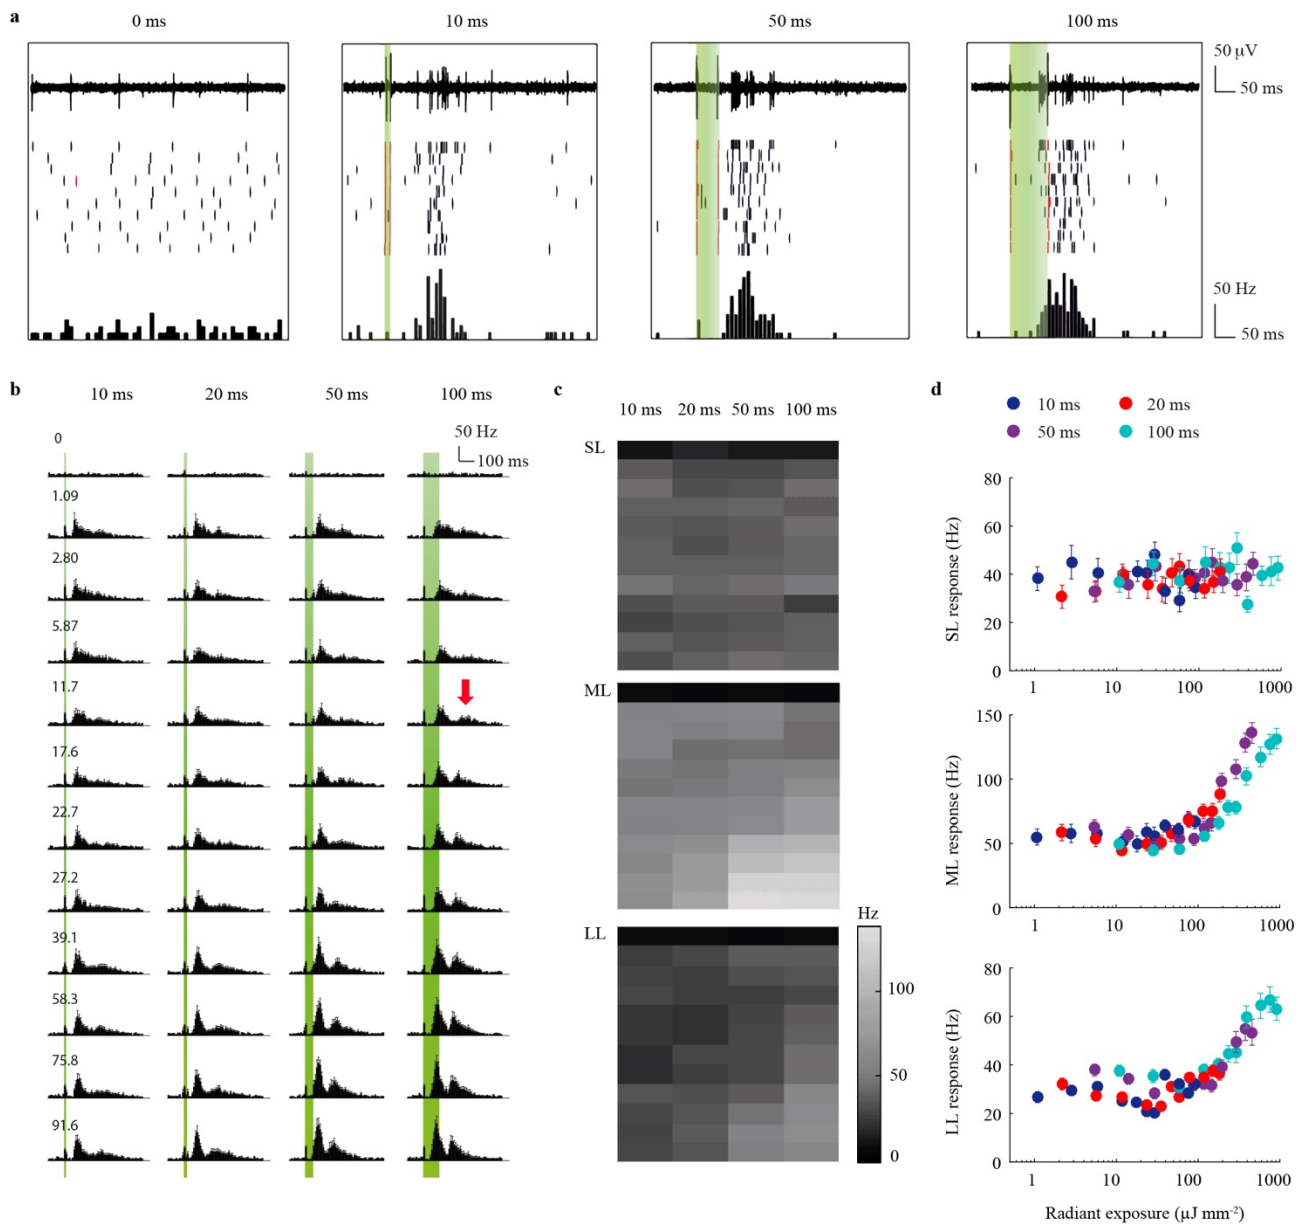

494

495 **Figure 2** Photovoltaic stimulation elicits exposure-related activity in rd10 retinas. **a** Representative  
496 extracellular spiking activity of a single RGC in response to 0, 10, 50, and 100 ms photovoltaic stimulation  
497 with POLYRETINA at  $2.80 \text{ mW mm}^{-2}$ . The top row shows the electrophysiological recordings upon  
498 illumination; the middle row the raster plot of 10 consecutive sweeps; the bottom row the PSTH (bin size  
499 ms). The red raster lines correspond to the detection of the stimulus artefacts. **b** Mean ( $\pm$  s.e.m) PSTH (bin size  
500 10 ms) of RGC activity upon 10, 20, 50 and 100 ms photovoltaic stimulation ( $n = 16$ , for each RGC 10 sweeps  
501 have been averaged). Light pulses with increasing irradiances have been delivered successively at 1.09, 2.80,  
502 5.87, 11.68, 17.60, 22.76, 27.17, 39.06, 58.32, 75.80, and 91.59  $\text{mW mm}^{-2}$ . The red arrow indicates the onset

This is the version of the article before peer review or editing, as submitted by an author to Journal of Neural Engineering. IOP Publishing Ltd is not responsible for any errors or omissions in this version of the manuscript or any version derived from it.

503 of LL spikes. In **a** and **b**, the green bars correspond to the duration of the light pulse. **c** Heatmaps of SL (top),  
504 ML (middle), and LL (bottom) mean firing rates upon 10, 20, 50, and 100 ms photovoltaic stimulation. The  
505 irradiance increases from the top row towards the bottom. **d** Mean ( $\pm$  s.e.m) firing rates of SL (top), ML  
506 (middle), and LL (bottom) responses, computed for all the tested exposures ( $n = 16$ , for each RGC 10 sweeps  
507 have been averaged) and plotted as function of the radiant exposure ( $\mu\text{J mm}^{-2}$ ), obtained by multiplying the  
508 irradiance ( $\mu\text{W mm}^{-2}$ ) per the pulse duration (s). Firing rates corresponding to 10, 20, 50, and 100 ms are  
509 respectively plotted in blue, red, violet and cyan.

This is the version of the article before peer review or editing, as submitted by an author to Journal of Neural Engineering. IOP Publishing Ltd is not responsible for any errors or omissions in this version of the manuscript or any version derived from it.

510

Figure 3

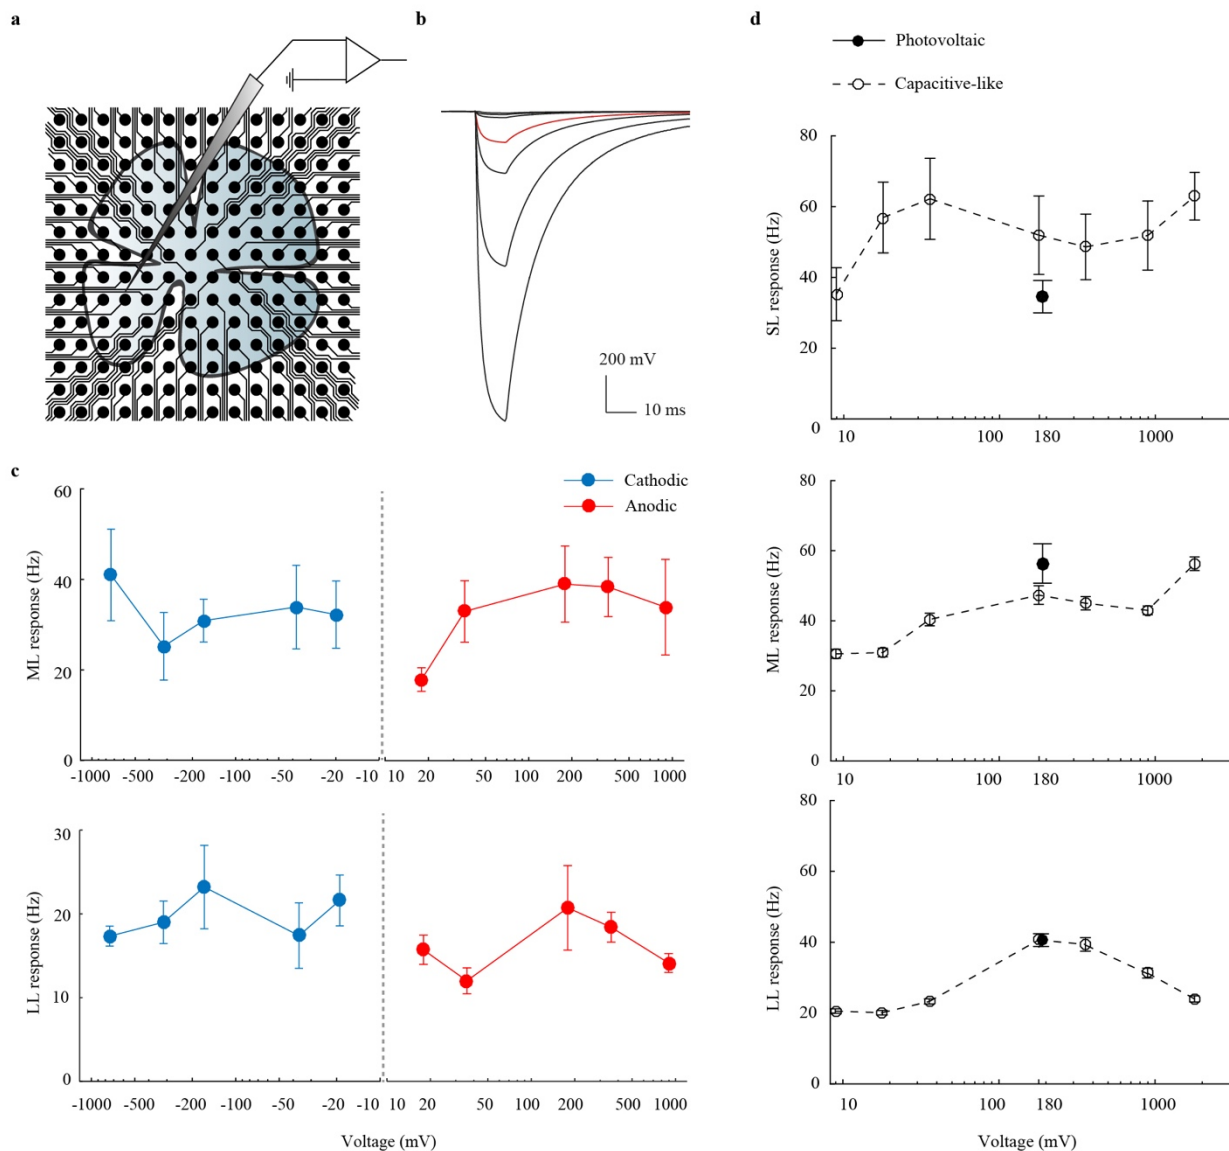

511

512 **Figure 3** Electrical stimulation of rd10 retinas with capacitive-like voltage pulses. **a** Sketch of the stimulating  
513 and recording set-up. **b** Capacitive-like waveforms used for electrical stimulation. The red trace corresponds  
514 to the mean photovoltage generated by a photovoltaic pixel of POLYRETINA upon a light pulse of 0.94 mW  
515 mm<sup>-2</sup> at 565 nm for 10 ms (data profile obtained from[15]) with a peak amplitude of 179 mV. The black traces  
516 show the capacitive-like voltage profiles obtained by scaling the peak amplitude to peak voltages of 8.95, 17.9,  
517 35.8, 368, 895 and 1790 mV. **c** Mean (± s.e.m) ML and LL spiking activities in response to anodic (red) or  
518 cathodic (blue) electrical stimulation with capacitive-like voltage pulses ( $n = 10$ , for each RGC 10 sweeps have  
519 been averaged). **d** Mean (± s.e.m) SL, ML and LL activities upon photovoltaic stimulation (10 ms, 1.09 mW



This is the version of the article before peer review or editing, as submitted by an author to Journal of Neural Engineering. IOP Publishing Ltd is not responsible for any errors or omissions in this version of the manuscript or any version derived from it.

520  $\text{mm}^{-2}$ ;  $n = 16$ , for each RGC 10 sweeps have been averaged) and electrical stimulation with capacitive-like  
521 pulses ( $n = 13$ , for each RGC 10 sweeps have been averaged).

This is the version of the article before peer review or editing, as submitted by an author to Journal of Neural Engineering. IOP Publishing Ltd is not responsible for any errors or omissions in this version of the manuscript or any version derived from it.

522

**Figure 4**

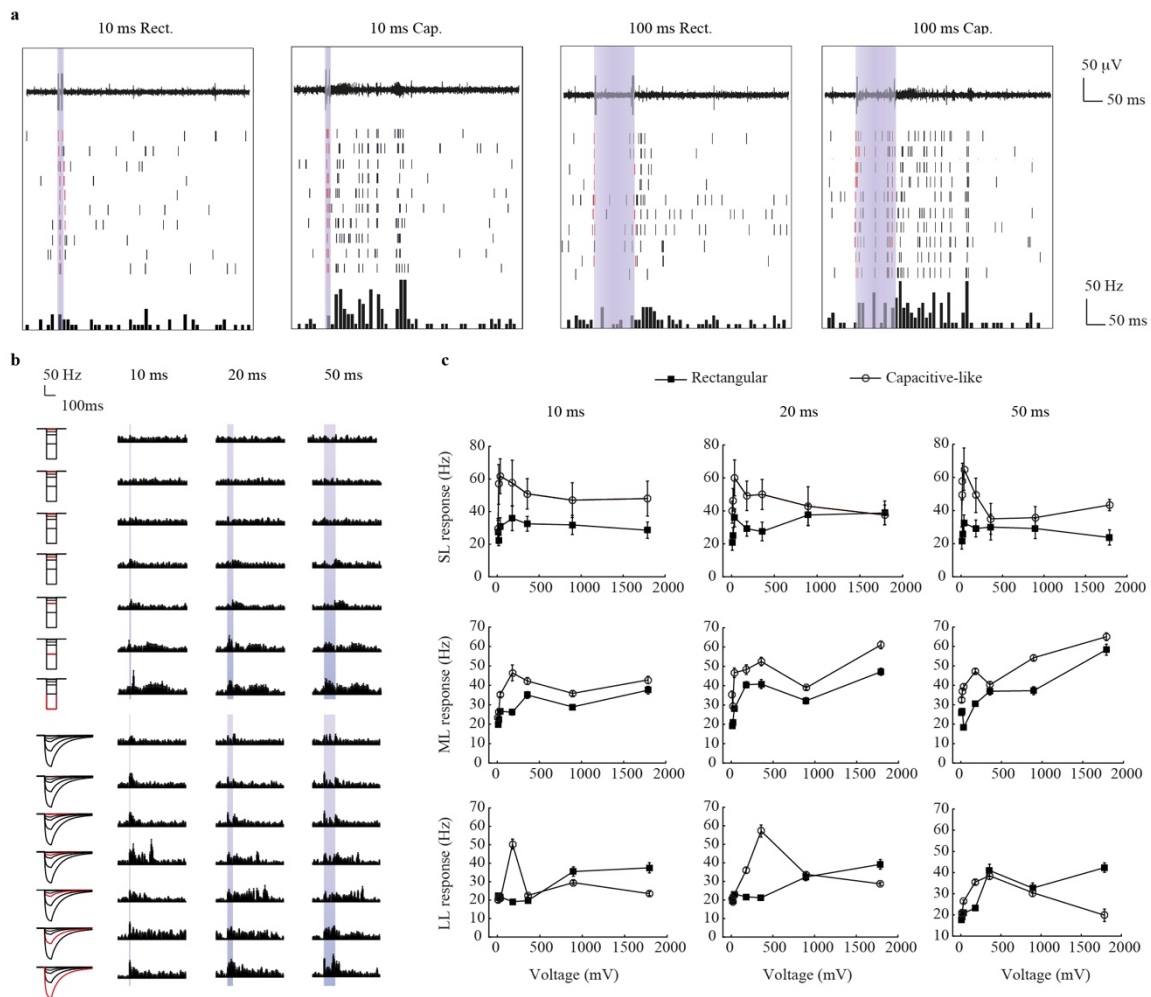

523

524 **Figure 4** Comparison of RGCs response to rectangular and capacitive-like electric pulses. **a** Representative  
 525 extracellular recordings of a single RGC in response to a 179 mV electrical stimulation with a 10 ms  
 526 rectangular pulse (left), a 10 ms capacitive-like pulse (middle left), a 100 ms rectangular pulse (middle right),  
 527 and a 100 ms capacitive-like pulse (right). The top row shows the electrophysiological recordings upon  
 528 electrical stimulation; the middle row the raster plot of 10 consecutive sweeps; the bottom row shows the  
 529 PSTHs (bin size 10 ms). The red raster lines correspond to the detection of the stimulus artefacts. **b** Mean ( $\pm$   
 530 s.e.m) PSTHs of RGC activity upon 10, 20, and 50 ms stimulation with rectangular (top) and capacitive-like  
 531 (bottom) pulses ( $n = 13$ , for each RGC 10 sweeps have been averaged). The voltage pulses have been delivered  
 532 with amplitudes of 8.95, 17.9, 35.8, 179, 368, 895 and 1790 mV. In **a** and **b**, the violet bar corresponds to the  
 533 duration of the electric pulse. **c** Quantification of the mean ( $\pm$  s.e.m) firing rate of SL, ML and LL spikes upon

This is the version of the article before peer review or editing, as submitted by an author to Journal of Neural Engineering. IOP Publishing Ltd is not responsible for any errors or omissions in this version of the manuscript or any version derived from it.

534 electrical stimulation with 10 ms (left), 50 ms (middle), and 100ms (right) rectangular or capacitive-like pulses  
535 ( $n = 13$ , for each RGC 10 sweeps have been averaged).

This is the version of the article before peer review or editing, as submitted by an author to Journal of Neural Engineering. IOP Publishing Ltd is not responsible for any errors or omissions in this version of the manuscript or any version derived from it.

536

Figure 5

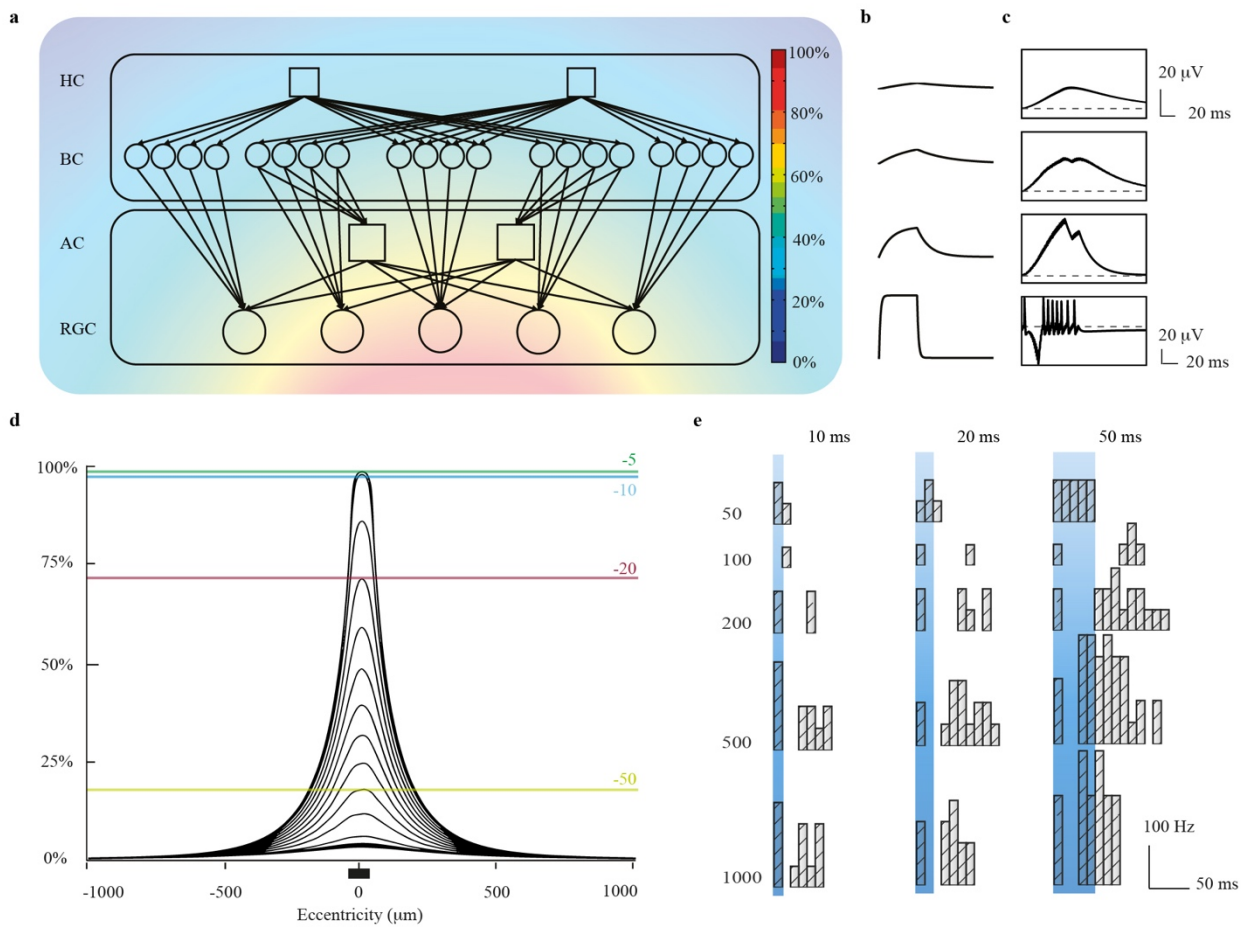

537

538 **Figure 5** Biophysical model of the retinal layers under epiretinal stimulation. **a** Topology of the model. Circles  
539 represent the excitatory cells (RGCs, BCs), while squares the inhibitory cells (HCs, ACs). The background  
540 image shows a FEA simulation of the potential generated by an electrode placed in the centre of the sketched  
541 network. **b** Normalized impulse responses of HC, BC, AC, and RGC layers. **c** Membrane potentials of HCs,  
542 BCs, ACs, and RGCs located at the centre of the epiretinal electrode, upon a 50 ms / 180 mV rectangular  
543 stimulation. **d** FEA simulation of the potential generated at the photovoltaic electrode when it is facing the  
544 retinal tissue. The electrode is represented as a black bar. Each potential trace is separated from the previous  
545 one by a 5- $\mu$ m step. The green line shows the potential at 5- $\mu$ m depth from the electrode surface, the blue line  
546 at 10- $\mu$ m depth, the red line at 20- $\mu$ m depth, and the yellow line at 50- $\mu$ m depth. **e** PSTH of a RGC located at  
547 the centre of the epiretinal electrode, upon 10, 20, and 50 ms stimulation. Rectangular voltage pulses have  
548 been delivered at 50, 100, 200, 500, and 1000 mV.

This is the version of the article before peer review or editing, as submitted by an author to Journal of Neural Engineering. IOP Publishing Ltd is not responsible for any errors or omissions in this version of the manuscript or any version derived from it.

This is the version of the article before peer review or editing, as submitted by an author to Journal of Neural Engineering. IOP Publishing Ltd is not responsible for any errors or omissions in this version of the manuscript or any version derived from it.

550

**Figure 6**

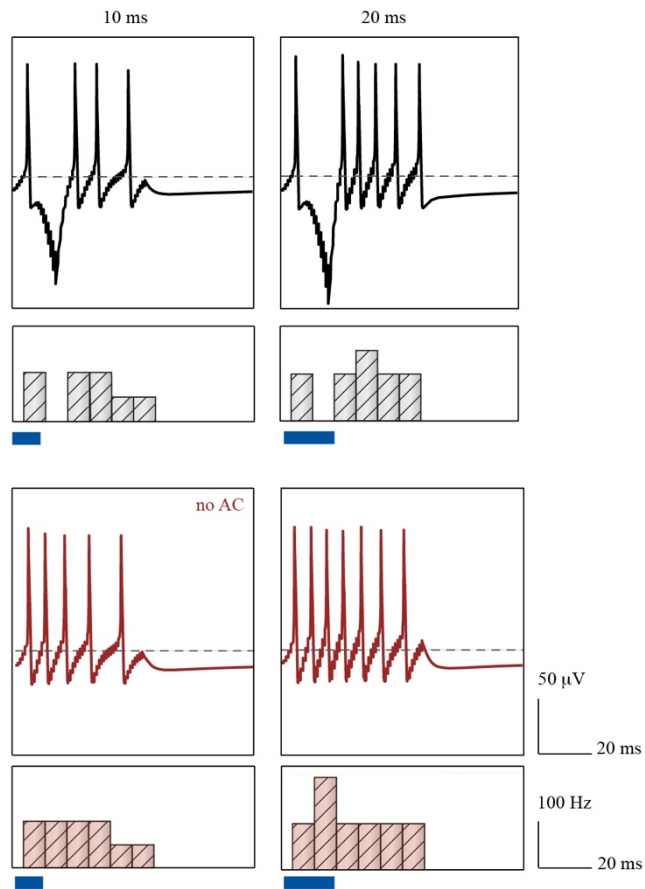

551

552 **Figure 6** Modelling of RGC activity in the absence of ACs. PSTHs and membrane potentials of the RGC  
553 located at the centre of the electrode, upon 10 and 20-ms capacitive-like stimulation at 250 mV, with (black)  
554 and without (red) presynaptic inhibition from the ACs.

This is the version of the article before peer review or editing, as submitted by an author to Journal of Neural Engineering. IOP Publishing Ltd is not responsible for any errors or omissions in this version of the manuscript or any version derived from it.

555

**Figure 7**

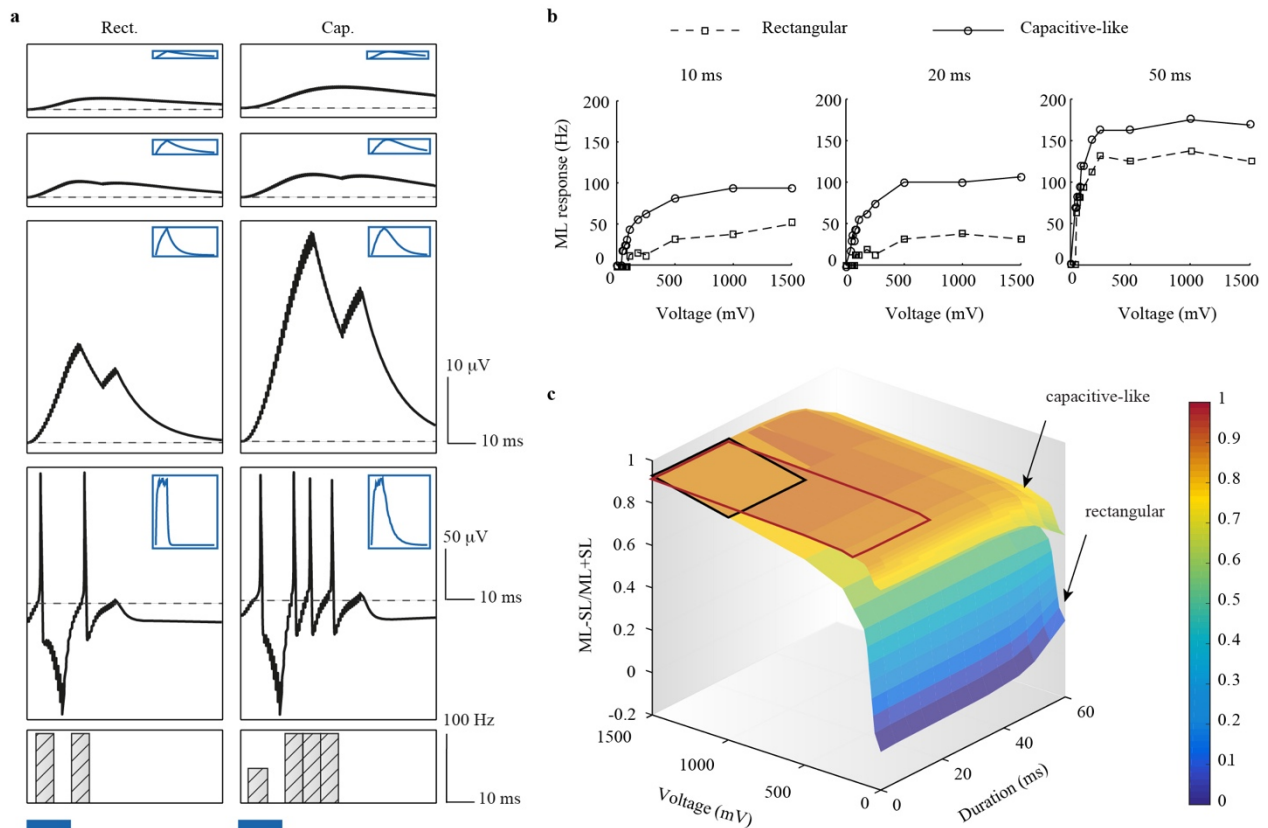

556

557 **Figure 7** Comparison of the retinal circuit response upon stimulation with rectangular and capacitive-like  
 558 voltage pulses. **a** PSTHs and membrane potentials of HCs, BCs, ACs, and RGCs located at the centre of the  
 559 epiretinal electrode, upon 180 mV / 20 ms, square (left) and prosthetic (right) stimulations. The top right corner  
 560 boxes show the normalized impulse response for each cell layer. **b** Indirect (ML) spiking activity generated in  
 561 the retinal ganglion cell located at the centre of the electrode by 10, 20, and 50 ms stimuli for both voltage  
 562 shapes. Delivered peak voltages ranged from 40 to 1500 mV. **c** Parametric model of the computationally  
 563 predicted RGC activity. The indirect over direct activity ratio has been modelled as a function of the delivered  
 564 pulse duration and voltage. The red and black squares respectively highlight the optimal parameters found for  
 565 capacitive-like and rectangular pulses (duration < 20 ms,  $ML-SL/ML+SL > 0.8$ ).

566

This is the version of the article before peer review or editing, as submitted by an author to Journal of Neural Engineering. IOP Publishing Ltd is not responsible for any errors or omissions in this version of the manuscript or any version derived from it.

567

**Figure 8**

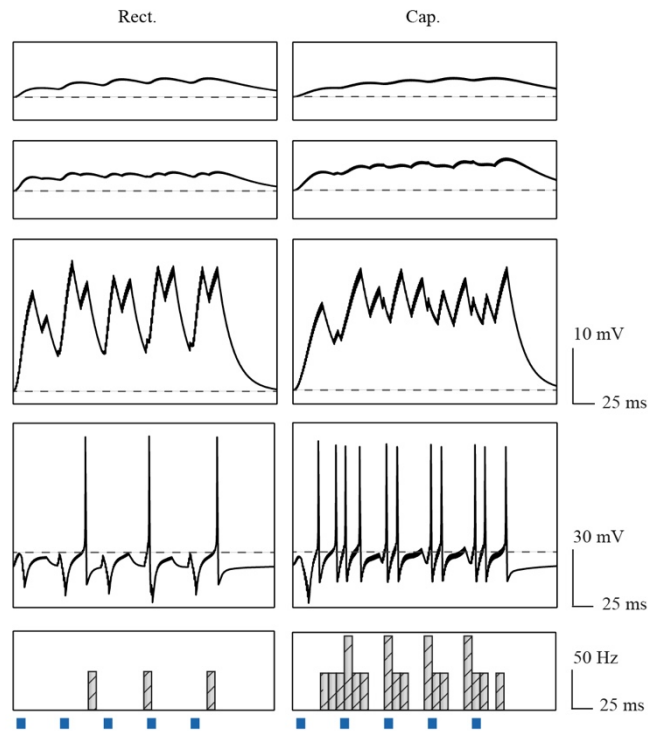

568

569 **Figure 8** Modelling of the retinal network activity upon repetitive stimulation. PSTHs and membrane potential  
570 of HCs, BPc, ACs, and RGCs located at the centre of the electrode, upon repetitive rectangular (left) and  
571 capacitive-like (right) stimulation. Voltage pulses of 10 ms at 20 mV pulses have been delivered at 20Hz.



This is the version of the article before peer review or editing, as submitted by an author to Journal of Neural Engineering. IOP Publishing Ltd is not responsible for any errors or omissions in this version of the manuscript or any version derived from it.

572

Figure 9

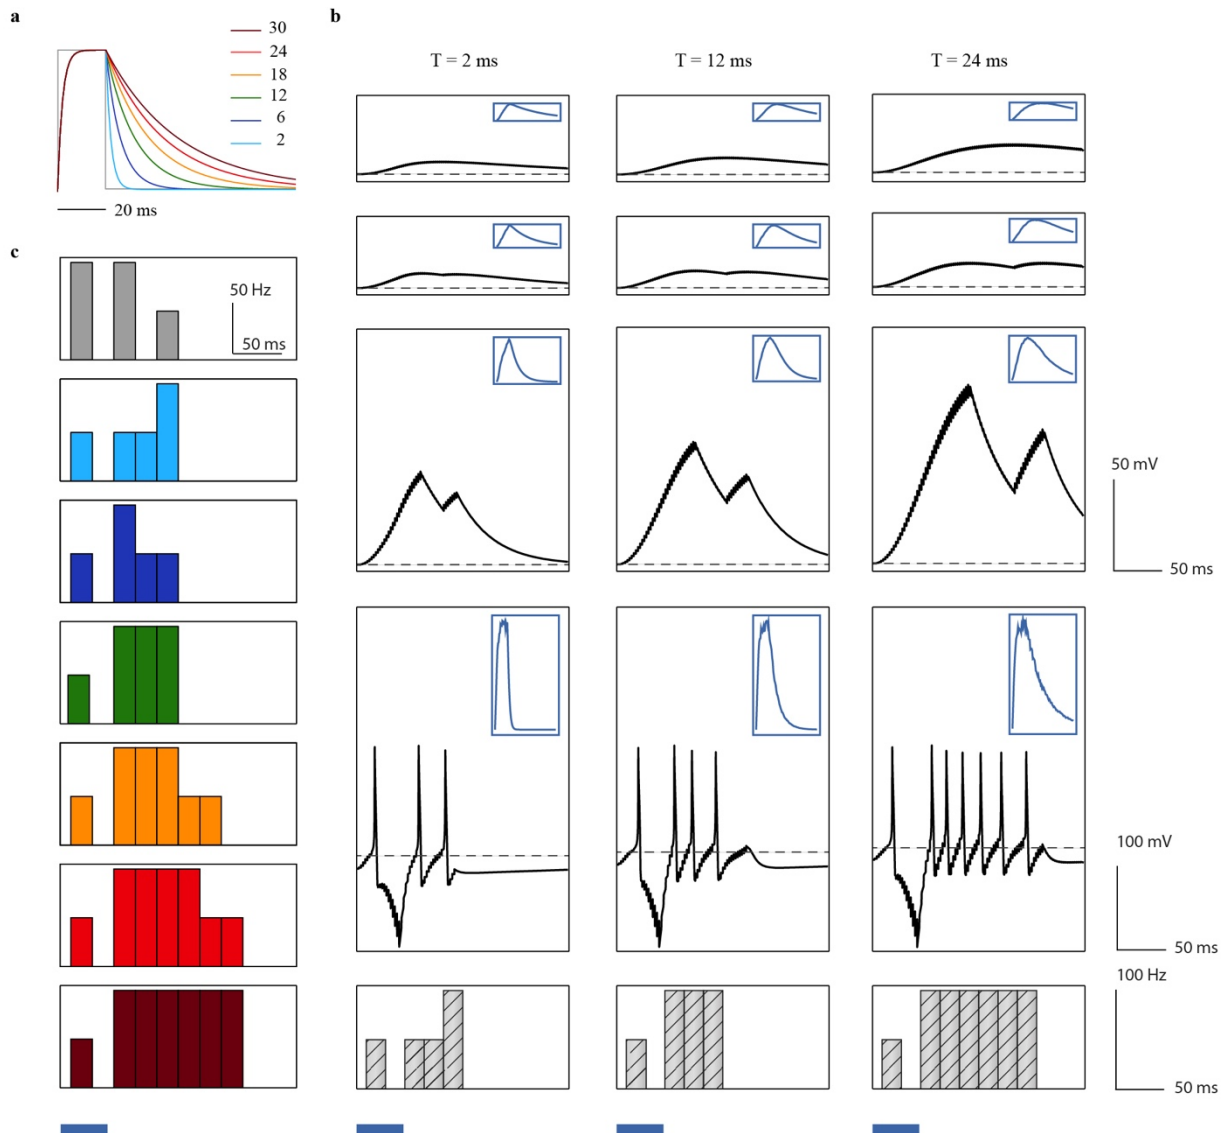

573

574 **Figure 9** Comparison of network-mediated activity elicited by various capacitive-like stimulus shapes. **a**  
575 Theoretical normalized photovoltage curves with various discharge time constants. The photovoltage  
576 measured on top of photovoltaic pixels[15] is fitted by the green curve. **b** PSTHs and membrane potentials of  
577 HCs, BPs, ACs, and RGCs located at the centre of the electrode, upon 20 ms capacitive-like stimulation at 250  
578 mV, with discharge time constants of 2, 12, and 24 ms. The top right corner boxes show the normalized impulse  
579 response for each cell layer. **c** PSTH of the RGC located at the centre of the electrode, upon 20 ms rectangular  
580 and capacitive-like stimulations at 250 mV. Discharge time constant of the capacitive-like stimuli was set to 2  
581 (light blue), 6 (blue), 12 (green), 18 (orange), 24 (red), and 30 (vinous) ms.

This is the version of the article before peer review or editing, as submitted by an author to Journal of Neural Engineering. IOP Publishing Ltd is not responsible for any errors or omissions in this version of the manuscript or any version derived from it.

This is the version of the article before peer review or editing, as submitted by an author to Journal of Neural Engineering. IOP Publishing Ltd is not responsible for any errors or omissions in this version of the manuscript or any version derived from it.

583

**Figure 10**

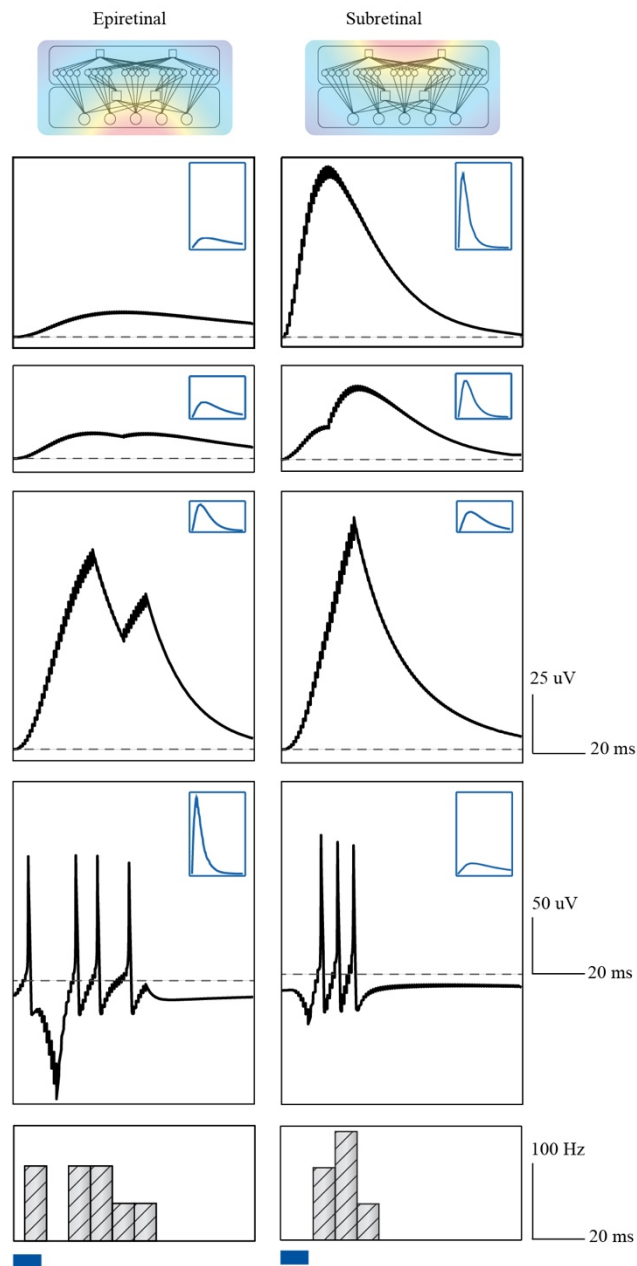

584

585 **Figure 10** Comparison of epiretinal and subretinal stimulation in-silico. PSTH and membrane potential of  
586 HCs, BCc, ACs, and RGCs located at the centre of the electrode, upon 10-ms capacitive-like stimulation at  
587 250 mV from an epiretinal or a subretinal electrode. Top right corner boxes show the normalized impulse  
588 response for each cell layer. For subretinal stimulation, the electrode was placed 10  $\mu\text{m}$  away from the  
589 horizontal cell layer.

590

This is the version of the article before peer review or editing, as submitted by an author to Journal of Neural Engineering. IOP Publishing Ltd is not responsible for any errors or omissions in this version of the manuscript or any version derived from it.

591

Figure 11

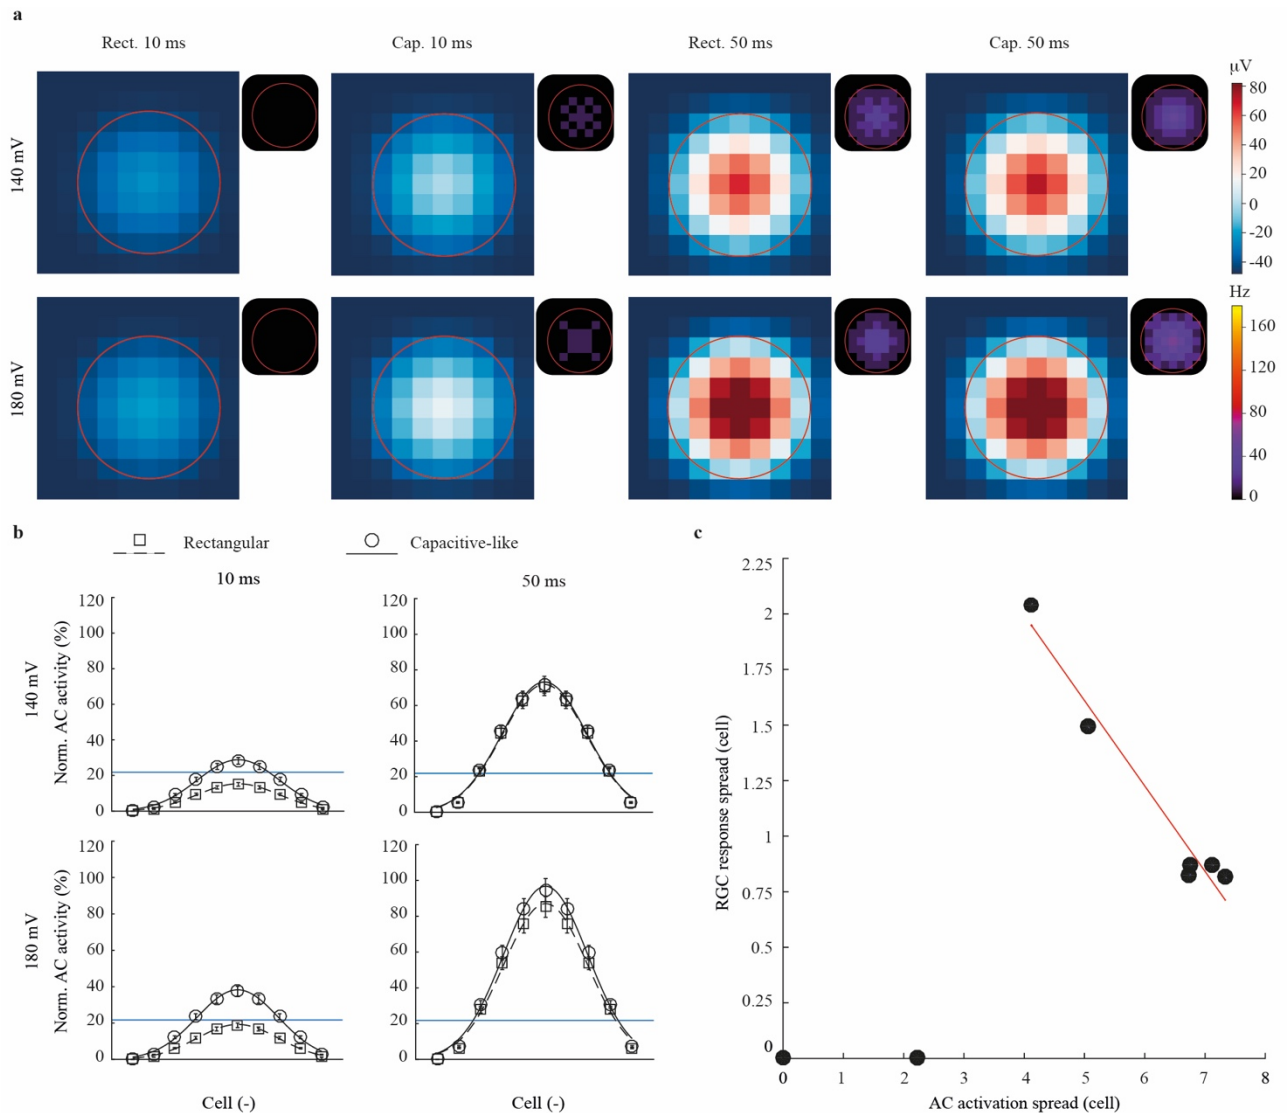

592

593 **Figure 11** Spatial modelling of the retinal circuit response. **a** Colour map of AC membrane potential rising  
 594 peak. A 10 x 10 pool of ACs located around the stimulation electrode has been recorded upon short (10 ms)  
 595 and long (50 ms) rectangular or capacitive-like voltage pulses at 140 mV (top) and 180 mV (bottom). Each  
 596 pixel represents the cell membrane potential difference with respect to the membrane potential threshold  
 597 required for the appearance of the ML activity. Positive differences are represented in white to red colours,  
 598 while negative (under-threshold) differences are represented in blue. The RGC indirect activity (ML)  
 599 corresponding to each condition is plotted on the top right corner of each colour map. The red circle indicates  
 600 the electrode location. **b** Mean normalized activation profile and Gaussian fit of the activity of inhibitory (AC)  
 601 cells upon 10 and 50 ms rectangular or capacitive-like voltage pulses peaking at 140 mV (top) and 180 mV

This is the version of the article before peer review or editing, as submitted by an author to Journal of Neural Engineering. IOP Publishing Ltd is not responsible for any errors or omissions in this version of the manuscript or any version derived from it.

602 (bottom). 10 x 10 cells have been averaged over 4 directions. The blue line indicates the membrane potential  
603 threshold for indirect activity. c Spatial extent of RGCs indirect response with respect to the extent of AC  
604 activity. The spatial extent of the RGC response has been calculated as the full width at half maximum of its  
605 activation profile fit, while the spatial extent of the AC activation has been calculated as the full width at the  
606 threshold for indirect activity.

This is the version of the article before peer review or editing, as submitted by an author to Journal of Neural Engineering. IOP Publishing Ltd is not responsible for any errors or omissions in this version of the manuscript or any version derived from it.

607

**Figure 12**

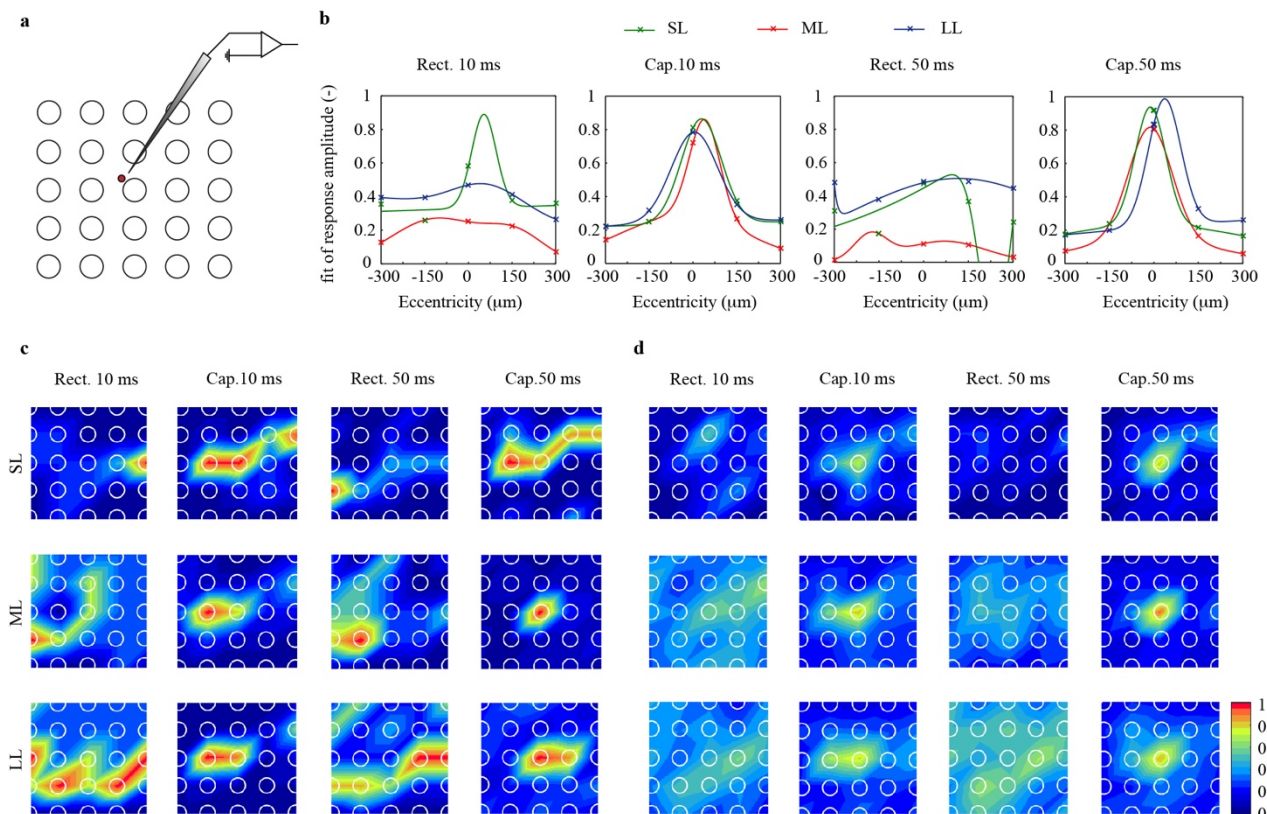

608

609 **Figure 12** Electrical receptive fields of RGC upon rectangular and capacitive-like stimulation. **a** Sketch of the  
 610 stimulating and recording electrodes. The approximated soma location of the recorded cell is highlighted in  
 611 red. **b** Fit of the grand average SL (green), ML (red), and LL (blue) responses amplitudes. Experimental  
 612 measures obtained with individual electrodes stimulation have been averaged over horizontal, diagonal, and  
 613 vertical axis and fitted with a Gaussian function ( $n = 8$ , for each RGC 10 sweeps have been averaged). eRF  
 614 diameters have been calculated as the minimal distance corresponding to the 3<sup>rd</sup> quartile of the activity  
 615 distribution. SL, ML, and LL eRF diameters have been quantified in 101, 107, and 218  $\mu\text{m}$  with short  
 616 rectangular stimulation; 226, 111, and 220  $\mu\text{m}$  with long rectangular stimulation; 82, 93, and 110  $\mu\text{m}$  with  
 617 short capacitive-like stimulation; and 66, 76, 86  $\mu\text{m}$  with long capacitive-like stimulation. **c** Representative  
 618 heatmap of normalized SL, ML, and LL activities recorded with short (10 ms) and long (50 ms) rectangular or  
 619 capacitive-like, both with peak voltages of 180 mV ( $n = 1$ , 10 sweeps have been averaged). **d** Mean heatmap  
 620 of normalized SL, ML, and LL activities recorded with short (10 ms) and long (50 ms) rectangular or  
 621 capacitive-like pulses with peak voltages of 180 mV ( $n = 8$ , for each RGC 10 sweeps have been averaged). **c**

This is the version of the article before peer review or editing, as submitted by an author to Journal of Neural Engineering. IOP Publishing Ltd is not responsible for any errors or omissions in this version of the manuscript or any version derived from it.

622 and **d** heatmaps were generated from linear interpolation of experimental SL, ML, and LL values recorded  
623 from individual electrode stimulations.

This is the version of the article before peer review or editing, as submitted by an author to Journal of Neural Engineering. IOP Publishing Ltd is not responsible for any errors or omissions in this version of the manuscript or any version derived from it.

624 **References**

- 625 [1] Bourne R R, Stevens G A, White R A, Smith J L, Flaxman S R, Price H, Jonas J B, Keeffe J, Leasher J,  
626 Naidoo K, Pesudovs K, Resnikoff S, Taylor H R and on behalf of the Group V 2013 Causes of vision loss  
627 worldwide, 1990–2010: a systematic analysis *The Lancet Global Health* **1** e339–49  
628
- 629 [2] Wong W, Su X, Li X, Cheung C G, Klein R, Cheng C-Y and Wong T 2014 Global prevalence of age-  
630 related macular degeneration and disease burden projection for 2020 and 2040: a systematic review and  
631 meta-analysis *Lancet Global Heal* **2** e106–16  
632
- 633 [3] Mitchell P, Bressler N, Doan Q V, Dolan C, Ferreira A, Osborne A, Rochtchina E, Danese M, Colman S  
634 and Wong T Y 2014 Estimated Cases of Blindness and Visual Impairment from Neovascular Age-Related  
635 Macular Degeneration Avoided in Australia by Ranibizumab Treatment *Plos One* **9** e101072  
636
- 637 [4] Santos A, Humayun, de Juan E, Greenburg R, Marsh M, Klock I and Milam A 1997 Preservation of the  
638 inner retina in retinitis pigmentosa. A morphometric analysis. *Archives of ophthalmology (Chicago, Ill. :  
639 1960)* **115** 511–5  
640
- 641 [5] Humayun M S, Weiland J D, Fujii G Y, Greenberg R, Williamson R, Little J, Mech B, Cimmarusti V,  
642 Boemel G, Dagnelie G and de Juan E 2003 Visual perception in a blind subject with a chronic  
643 microelectronic retinal prosthesis. *Vision research* **43** 2573–81  
644
- 645 [6] Medeiros N and Curcio C 2001 Preservation of ganglion cell layer neurons in age-related macular  
646 degeneration. *Invest Ophth Vis Sci* **42** 795–803  
647
- 648 [7] Weiland J D, Cho A K and Humayun M S 2011 Retinal prostheses: current clinical results and future  
649 needs. *Ophthalmology* **118** 2227–37  
650



This is the version of the article before peer review or editing, as submitted by an author to Journal of Neural Engineering. IOP Publishing Ltd is not responsible for any errors or omissions in this version of the manuscript or any version derived from it.

- 651 [8] Luo Y and da Cruz L 2016 The Argus® II Retinal Prosthesis System *Progress in Retinal and Eye*  
652 *Research* **50** 89–107  
653
- 654 [9] Stingl K, Bartz-Schmidt K, Besch D, Chee C K, Cottrill C L, Gekeler F, Groppe M, Jackson T L,  
655 MacLaren R E, Koitschev A, Kusnyerik A, Neffendorf J, Nemeth J, Naeem M, Peters T, Ramsden J D,  
656 Sachs H, Simpson A, Singh M S, Wilhelm B, Wong D and Zrenner E 2015 Subretinal Visual Implant Alpha  
657 IMS – Clinical trial interim report *Vision Research* **111** 149–60  
658
- 659 [10] Lorach H, Goetz G, Smith R, Lei X, Mandel Y, Kamins T, Mathieson K, Huie P, Harris J, Sher A and  
660 Palanker D 2015 Photovoltaic restoration of sight with high visual acuity. *Nature medicine* **21** 476–82  
661
- 662 [11] Maya-Vetencourt J F, Ghezzi D, Antognazza M R, Colombo E, Mete M, Feyen P, Desii A, Buschiazzo  
663 A, Paolo M, Marco S, Ticconi F, Emionite L, Shmal D, Marini C, Donelli I, Freddi G, Maccarone R, Bisti S,  
664 Sambuceti G, Pertile G, Lanzani G and Benfenati F 2017 A fully organic retinal prosthesis restores vision in  
665 a rat model of degenerative blindness. *Nature materials*  
666
- 667 [12] Antognazza M, Paolo M, Ghezzi D, Mete M, Marco S, Maya-Vetencourt J, Maccarone R, Desii A,  
668 Fonzo F, Bramini M, Russo A, Laudato L, Donelli I, Cilli M, Freddi G, Pertile G, Lanzani G, Bisti S and  
669 Benfenati F 2016 Characterization of a Polymer-Based, Fully Organic Prosthesis for Implantation into the  
670 Subretinal Space of the Rat *Advanced Healthcare Materials* **5** 2271–82  
671
- 672 [13] Antognazza M, Martino N, Ghezzi D, Feyen P, Colombo E, Endeman D, Benfenati F and Lanzani G  
673 2015 Shedding Light on Living Cells *Advanced Materials* **27** 7662–9  
674
- 675 [14] Fornos A P, Sommerhalder J, Rappaz B, Safran A B and Pelizzone M 2005 Simulation of artificial  
676 vision, III: do the spatial or temporal characteristics of stimulus pixelization really matter? *Investigative*  
677 *ophthalmology & visual science* **46** 3906–12

This is the version of the article before peer review or editing, as submitted by an author to Journal of Neural Engineering. IOP Publishing Ltd is not responsible for any errors or omissions in this version of the manuscript or any version derived from it.

678

679 [15] Ferlauto L, Leccardi M, Chenais N, Gilliéron S, Vagni P, Bevilacqua M, Wolfensberger T J, Sivula K  
680 and Ghezzi D 2018 Design and validation of a foldable and photovoltaic wide-field epiretinal prosthesis  
681 *Nature Communications* **9** 992

682

683 [16] Spencer T C, Fallon J B, Thien P C and Shivdasani M N 2016 Spatial Restriction of Neural Activation  
684 Using Focused Multipolar Stimulation With a Retinal Prosthesis *Spatial Restriction of Neural Activation*  
685 *Invest Ophth Vis Sci* **57** 3181–91

686

687 [17] Flores T, Lei X, Huang T, Lorach H, Dalal R, Galambos L, Kamins T, Mathieson K and Palanker D  
688 2018 Optimization of pillar electrodes in subretinal prosthesis for enhanced proximity to target neurons  
689 *Journal of Neural Engineering* **15** 036011

690

691 [18] Lee K-W, Watanabe Y, Kigure C, Fukushima T, Koyanagi M and Tanaka T 2012 Pillar-shaped  
692 stimulus electrode array for high-efficiency stimulation of fully implantable epiretinal prosthesis *J*  
693 *Micromech Microeng* **22** 105015

694

695 [19] Airaghi Leccardi M J I, Vagni P and Ghezzi D 2018 Multilayer 3D electrodes for neural implants *J*  
696 *Neural Eng*

697

698 [20] Samba R, Herrmann T and Zeck G 2015 PEDOT–CNT coated electrodes stimulate retinal neurons at  
699 low voltage amplitudes and low charge densities *Journal of Neural Engineering* **12** 016014

700

701 [21] Biswas S, Sikdar D, Das D, Mahadevappa M and Das S 2017 PDMS based multielectrode arrays for  
702 superior in-vitro retinal stimulation and recording *Biomedical Microdevices* **19** 75

703

704 [22] Ferlauto L, D'Angelo A, Vagni P, Leccardi M, Mor F, Cuttaz E, Heuschkel M, Stoppini L and Ghezzi

This is the version of the article before peer review or editing, as submitted by an author to Journal of Neural Engineering. IOP Publishing Ltd is not responsible for any errors or omissions in this version of the manuscript or any version derived from it.

- 705 D 2018 Development and Characterization of PEDOT:PSS/Alginate Soft Microelectrodes for Application in  
706 Neuroprosthetics *Front Neurosci-switz* **12** 648  
707
- 708 [23] Behrend M R, Ahuja A K, Humayun M S, Chow R H and Weiland J D 2011 Resolution of the epiretinal  
709 prosthesis is not limited by electrode size. *IEEE transactions on neural systems and rehabilitation*  
710 *engineering : a publication of the IEEE Engineering in Medicine and Biology Society* **19** 436–42  
711
- 712 [24] Weitz A C, Nanduri D, Behrend M R, Gonzalez-Calle A, Greenberg R J, Humayun M S, Chow R H and  
713 Weiland J D 2015 Improving the spatial resolution of epiretinal implants by increasing stimulus pulse  
714 duration. *Science translational medicine* **7** 318ra203  
715
- 716 [25] Esler T B, Kerr R R, Tahayori B, Grayden D B, Meffin H and Burkitt A N 2018 Minimizing activation  
717 of overlying axons with epiretinal stimulation: The role of fiber orientation and electrode configuration  
718 *PLOS ONE* **13** e0193598  
719
- 720 [26] Grosberg L E, Ganesan K, Goetz G A, Madugula S S, Bhaskhar N, Fan V, Li P, Hottowy P, Dabrowski  
721 W, Sher A, Litke A M, Mitra S and Chichilnisky E 2017 Activation of ganglion cells and axon bundles using  
722 epiretinal electrical stimulation *J Neurophysiol* **118** 1457–71  
723
- 724 [27] Nanduri D, Humayun, Greenberg R J, McMahon M J and Weiland J D 2008 Retinal Prosthesis  
725 Phosphene Shape Analysis 2008 *30th Annu Int Conf Ieee Eng Medicine Biology Soc* **2008** 1785–8  
726
- 727 [28] Nanduri D, Fine I, Horsager A, Boynton G M, Humayun M S, Greenberg R J and Weiland J D 2012  
728 Frequency and Amplitude Modulation Have Different Effects on the Percepts Elicited by Retinal Stimulation  
729 *Invest Ophth Vis Sci* **53** 205–14  
730
- 731 [29] Tsai D, Chen S, Protti D A, Morley J W, Suaning G J and Lovell N H 2012 Responses of Retinal

This is the version of the article before peer review or editing, as submitted by an author to Journal of Neural Engineering. IOP Publishing Ltd is not responsible for any errors or omissions in this version of the manuscript or any version derived from it.

- 732 Ganglion Cells to Extracellular Electrical Stimulation, from Single Cell to Population: Model-Based  
733 Analysis *Plos One* **7** e53357  
734
- 735 [30] Yue L, Weiland J D, Roska B and Humayun M S 2016 Retinal stimulation strategies to restore vision:  
736 Fundamentals and systems. *Progress in retinal and eye research* **53** 21–47  
737
- 738 [31] Boinagrov D, Pangratz-Fuehrer S, Goetz G and Palanker D 2014 Selectivity of direct and network-  
739 mediated stimulation of the retinal ganglion cells with epi-, sub- and intraretinal electrodes *Journal of Neural*  
740 *Engineering* **11** 026008  
741
- 742 [32] Ho E, Smith R, Goetz G A, Lei X, Galambos L, Kamins T I, Harris J, Mathieson K, Palanker D and  
743 Sher A 2017 Spatio-temporal characteristics of retinal response to network-mediated photovoltaic  
744 stimulation. *Journal of neurophysiology* jn.00872.2016  
745
- 746 [33] Stett A, Barth W, Weiss S, Haemmerle H and Zrenner E 2000 Electrical multisite stimulation of the  
747 isolated chicken retina *Vision Research* **40** 1785–95  
748
- 749 [34] Fried S, Hsueh H and Werblin F 2006 A Method for Generating Precise Temporal Patterns of Retinal  
750 Spiking Using Prosthetic Stimulation *J Neurophysiol* **95** 970–8  
751
- 752 [35] Tsai D, Morley J W, Suaning G J and Lovell N H 2009 Direct Activation and Temporal Response  
753 Properties of Rabbit Retinal Ganglion Cells Following Subretinal Stimulation *J Neurophysiol* **102** 2982–93  
754
- 755 [36] Walston S T, Chow R H and Weiland J D 2018 Direct measurement of bipolar cell responses to  
756 electrical stimulation in wholemout mouse retina *Journal of Neural Engineering* **15** 046003  
757
- 758 [37] Sekhar S, Jalligampala A, Zrenner E and Rathbun D L 2016 Tickling the retina: integration of

This is the version of the article before peer review or editing, as submitted by an author to Journal of Neural Engineering. IOP Publishing Ltd is not responsible for any errors or omissions in this version of the manuscript or any version derived from it.

- 759 subthreshold electrical pulses can activate retinal neurons *Journal of Neural Engineering* **13** 046004  
760
- 761 [38] Im M, Werginz P and Fried S I 2018 Electric stimulus duration alters network-mediated responses  
762 depending on retinal ganglion cell type *Journal of Neural Engineering* **15** 036010  
763
- 764 [39] Im M and Fried S I 2015 Indirect activation elicits strong correlations between light and electrical  
765 responses in ON but not OFF retinal ganglion cells *J Physiology* **593** 3577–96  
766
- 767 [40] Freeman D K, Eddington D K, Rizzo J F and Fried S I 2010 Selective activation of neuronal targets  
768 with sinusoidal electric stimulation. *J Neurophysiol* **104** 2778–91  
769
- 770 [41] Jensen R J, Ziv O R and Rizzo J F 2005 Responses of rabbit retinal ganglion cells to electrical  
771 stimulation with an epiretinal electrode *J Neural Eng* **2** S16  
772
- 773 [42] Lee J-I and Im M 2018 Non-rectangular waveforms are more charge-efficient than rectangular one in  
774 eliciting network-mediated responses of ON type retinal ganglion cells *Journal of Neural Engineering*  
775
- 776 [43] Rathbun D L, Ghorbani N, Shabani H, Zrenner E and Hosseinzadeh Z 2018 Spike-triggered average  
777 electrical stimuli as input filters for bionic vision - a perspective. *J Neural Eng*  
778
- 779 [44] Quiroga Q R, Nadasdy Z and Ben-Shaul Y 2006 Unsupervised Spike Detection and Sorting with  
780 Wavelets and Superparamagnetic Clustering *Neural Computation* **16** 1661–87  
781
- 782 [45] Peyser A, Sinha A, Vennemo S B, Ippen T, Jordan J, Graber S, Morrison A, Trensch G, Fardet T, Mørk  
783 H, Hahne J, Schuecker J and Schmidt M 2017 NEST 2.14.0. Zenodo  
784
- 785 [46] Gargini C, Terzibasi E, Mazzoni F and Strettoi E 2007 Retinal organization in the retinal degeneration

This is the version of the article before peer review or editing, as submitted by an author to Journal of Neural Engineering. IOP Publishing Ltd is not responsible for any errors or omissions in this version of the manuscript or any version derived from it.

- 786 10 (rd10) mutant mouse: A morphological and ERG study *J Comp Neurol* **500** 222–38
- 787
- 788 [47] Pennesi M E, Michaels K V, Magee S S, Maricle A, Davin S P, Garg A K, Gale M J, Tu D C, Wen Y,  
789 Erker L R and Francis P J 2012 Long-Term Characterization of Retinal Degeneration in rd1 and rd10 Mice  
790 Using Spectral Domain Optical Coherence TomographySD-OCT Imaging of rd1 and rd10 Mice *Invest*  
791 *Ophth Vis Sci* **53** 4644–56
- 792
- 793 [48] Margolis D J and Detwiler P B 2011 Cellular Origin of Spontaneous Ganglion Cell Spike Activity in  
794 Animal Models of Retinitis Pigmentosa *J Ophthalmol* **2011** 507037
- 795
- 796 [49] Stasheff S F, Shankar M and Andrews M P 2011 Developmental time course distinguishes changes in  
797 spontaneous and light-evoked retinal ganglion cell activity in rd1 and rd10 mice *J Neurophysiol* **105** 3002–9
- 798
- 799 [50] Goo Y, Park D, Ahn J and Senok S S 2016 Spontaneous Oscillatory Rhythms in the Degenerating  
800 Mouse Retina Modulate Retinal Ganglion Cell Responses to Electrical Stimulation *Front Cell Neurosci* **9**  
801 512
- 802
- 803 [51] Sekirnjak C, Hottowy P, Sher A, Dabrowski W, Litke A and Chichilnisky E 2006 Electrical Stimulation  
804 of Mammalian Retinal Ganglion Cells With Multielectrode Arrays *J Neurophysiol* **95** 3311–27
- 805
- 806 [52] Butts D A, Weng C, Jin J, Yeh C-I, Lesica N A, Alonso J-M and Stanley G B 2007 Temporal precision  
807 in the neural code and the timescales of natural vision *Nature* **449** 92
- 808
- 809 [53] Nakazawa T, Nakazawa C, Matsubara A, Noda K, Hisatomi T, She H, Michaud N, Hafezi-Moghadam  
810 A, Miller J W and Benowitz L I 2006 Tumor Necrosis Factor- $\alpha$  Mediates Oligodendrocyte Death and  
811 Delayed Retinal Ganglion Cell Loss in a Mouse Model of Glaucoma *J Neurosci* **26** 12633–41
- 812

This is the version of the article before peer review or editing, as submitted by an author to Journal of Neural Engineering. IOP Publishing Ltd is not responsible for any errors or omissions in this version of the manuscript or any version derived from it.

- 813 [54] Watson A B 2014 A formula for human retinal ganglion cell receptive field density as a function of  
814 visual field location. *J Vision* **14** 15–15  
815
